# Supplementary material for: Association of urban forest landscape characteristics with biomass and soil carbon stocks in Harbin City, Northeastern China
Source: PeerJ. 2018 Oct 29;6:e5825. doi: 10.7717/peerj.5825 (PMC6211268; doi:10.7717/peerj.5825)
Supplement: Data S1 [file peerj-06-5825-s001.xlsx]

## Sheet: mertics_patch_level
LID	PID	TYPE	AREA_ha	PERIM_m	ENN_m	PARA_m/m2
F:\landscape\forest_land	11529	cls_1	0.0008	12	4	1.5
F:\landscape\forest_land	4830	cls_3	0.0004	8	4	2
F:\landscape\forest_land	5753	cls_4	0.0004	8	4	2
F:\landscape\forest_land	1290	cls_1	0.0036	24	4	0.666667
F:\landscape\forest_land	4094	cls_2	0.0036	24	4	0.666667
F:\landscape\forest_land	10859	cls_2	0.0036	24	4	0.666667
F:\landscape\forest_land	6842	cls_3	0.0036	24	4	0.666667
F:\landscape\forest_land	7919	cls_3	0.0036	24	4	0.666667
F:\landscape\forest_land	8559	cls_3	0.0036	24	4	0.666667
F:\landscape\forest_land	9519	cls_3	0.0036	24	4	0.666667
F:\landscape\forest_land	9928	cls_3	0.0036	24	4	0.666667
F:\landscape\forest_land	9666	cls_4	0.0032	24	4	0.75
F:\landscape\forest_land	5798	cls_3	0.004	28	4	0.7
F:\landscape\forest_land	8816	cls_3	0.004	28	4	0.7
F:\landscape\forest_land	9147	cls_3	0.004	28	4	0.7
F:\landscape\forest_land	10788	cls_1	0.004	28	4	0.7
F:\landscape\forest_land	5832	cls_2	0.004	28	4	0.7
F:\landscape\forest_land	8171	cls_3	0.004	28	4	0.7
F:\landscape\forest_land	4345	cls_3	0.0044	28	4	0.636364
F:\landscape\forest_land	5245	cls_3	0.0044	28	4	0.636364
F:\landscape\forest_land	10522	cls_3	0.004	28	4	0.7
F:\landscape\forest_land	4264	cls_2	0.0052	32	4	0.615385
F:\landscape\forest_land	10868	cls_2	0.0052	32	4	0.615385
F:\landscape\forest_land	1347	cls_1	0.0056	32	4	0.571429
F:\landscape\forest_land	2815	cls_4	0.0068	36	4	0.529412
F:\landscape\forest_land	8122	cls_3	0.0068	36	4	0.529412
F:\landscape\forest_land	9972	cls_3	0.0072	36	4	0.5
F:\landscape\forest_land	2938	cls_4	0.0072	36	4	0.5
F:\landscape\forest_land	5520	cls_3	0.0068	36	4	0.529412
F:\landscape\forest_land	3696	cls_2	0.0084	40	4	0.47619
F:\landscape\forest_land	5516	cls_3	0.0084	40	4	0.47619
F:\landscape\forest_land	8755	cls_3	0.0096	40	4	0.416667
F:\landscape\forest_land	2987	cls_3	0.0104	44	4	0.423077
F:\landscape\forest_land	3230	cls_2	0.0132	48	4	0.363636
F:\landscape\forest_land	9791	cls_2	0.0008	12	4.4721	1.5
F:\landscape\forest_land	11634	cls_3	0.0008	12	4.4721	1.5
F:\landscape\forest_land	2822	cls_4	0.0008	12	4.4721	1.5
F:\landscape\forest_land	11334	cls_4	0.0008	12	4.4721	1.5
F:\landscape\forest_land	2533	cls_1	0.0004	8	4.4721	2
F:\landscape\forest_land	813	cls_2	0.0004	8	4.4721	2
F:\landscape\forest_land	815	cls_2	0.0004	8	4.4721	2
F:\landscape\forest_land	817	cls_2	0.0004	8	4.4721	2
F:\landscape\forest_land	858	cls_2	0.0004	8	4.4721	2
F:\landscape\forest_land	951	cls_2	0.0004	8	4.4721	2
F:\landscape\forest_land	1237	cls_2	0.0004	8	4.4721	2
F:\landscape\forest_land	1315	cls_2	0.0004	8	4.4721	2
F:\landscape\forest_land	2315	cls_2	0.0004	8	4.4721	2
F:\landscape\forest_land	6027	cls_2	0.0004	8	4.4721	2
F:\landscape\forest_land	6230	cls_2	0.0004	8	4.4721	2
F:\landscape\forest_land	6722	cls_2	0.0004	8	4.4721	2
F:\landscape\forest_land	7229	cls_2	0.0004	8	4.4721	2
F:\landscape\forest_land	1414	cls_3	0.0004	8	4.4721	2
F:\landscape\forest_land	1415	cls_3	0.0004	8	4.4721	2
F:\landscape\forest_land	1956	cls_3	0.0004	8	4.4721	2
F:\landscape\forest_land	6586	cls_3	0.0004	8	4.4721	2
F:\landscape\forest_land	8889	cls_3	0.0004	8	4.4721	2
F:\landscape\forest_land	2820	cls_4	0.0004	8	4.4721	2
F:\landscape\forest_land	2539	cls_2	0.0012	16	4.4721	1.33333
F:\landscape\forest_land	7493	cls_3	0.004	28	4.4721	0.7
F:\landscape\forest_land	6343	cls_3	0.006	32	4.4721	0.533333
F:\landscape\forest_land	405	cls_2	0.0104	44	4.4721	0.423077
F:\landscape\forest_land	10562	cls_3	0.0032	24	5.6569	0.75
F:\landscape\forest_land	7673	cls_3	0.0032	24	5.6569	0.75
F:\landscape\forest_land	4375	cls_1	0.004	28	5.6569	0.7
F:\landscape\forest_land	10414	cls_3	0.004	28	5.6569	0.7
F:\landscape\forest_land	4711	cls_3	0.004	28	5.6569	0.7
F:\landscape\forest_land	8692	cls_3	0.004	28	5.6569	0.7
F:\landscape\forest_land	4183	cls_2	0.0044	28	5.6569	0.636364
F:\landscape\forest_land	4414	cls_2	0.0044	28	5.6569	0.636364
F:\landscape\forest_land	7893	cls_2	0.0044	28	5.6569	0.636364
F:\landscape\forest_land	1790	cls_3	0.0072	36	5.6569	0.5
F:\landscape\forest_land	3718	cls_2	0.0084	40	5.6569	0.47619
F:\landscape\forest_land	4833	cls_3	0.0004	8	6	2
F:\landscape\forest_land	8074	cls_4	0.0032	24	6	0.75
F:\landscape\forest_land	4190	cls_3	0.0036	24	6	0.666667
F:\landscape\forest_land	8208	cls_3	0.0032	24	6	0.75
F:\landscape\forest_land	5799	cls_3	0.004	28	6	0.7
F:\landscape\forest_land	8133	cls_3	0.004	28	6	0.7
F:\landscape\forest_land	4122	cls_2	0.004	28	6	0.7
F:\landscape\forest_land	10846	cls_2	0.004	28	6	0.7
F:\landscape\forest_land	4933	cls_2	0.004	28	6	0.7
F:\landscape\forest_land	11051	cls_2	0.0044	28	6	0.636364
F:\landscape\forest_land	9274	cls_4	0.0044	28	6	0.636364
F:\landscape\forest_land	3509	cls_3	0.0052	32	6	0.615385
F:\landscape\forest_land	2718	cls_4	0.0052	32	6	0.615385
F:\landscape\forest_land	4478	cls_2	0.0056	32	6	0.571429
F:\landscape\forest_land	6894	cls_3	0.0056	32	6	0.571429
F:\landscape\forest_land	408	cls_2	0.006	32	6	0.533333
F:\landscape\forest_land	4006	cls_3	0.0056	32	6	0.571429
F:\landscape\forest_land	4538	cls_3	0.0076	36	6	0.473684
F:\landscape\forest_land	419	cls_2	0.0104	44	6	0.423077
F:\landscape\forest_land	413	cls_2	0.0128	48	6	0.375
F:\landscape\forest_land	8050	cls_3	0.0148	52	6	0.351351
F:\landscape\forest_land	4642	cls_2	0.0008	12	6.3246	1.5
F:\landscape\forest_land	2524	cls_1	0.0004	8	6.3246	2
F:\landscape\forest_land	1655	cls_2	0.0004	8	6.3246	2
F:\landscape\forest_land	1727	cls_2	0.0004	8	6.3246	2
F:\landscape\forest_land	11337	cls_4	0.0004	8	6.3246	2
F:\landscape\forest_land	7530	cls_1	0.0032	24	6.3246	0.75
F:\landscape\forest_land	3994	cls_3	0.004	28	6.3246	0.7
F:\landscape\forest_land	8963	cls_3	0.004	28	6.3246	0.7
F:\landscape\forest_land	8033	cls_4	0.004	28	6.3246	0.7
F:\landscape\forest_land	6331	cls_3	0.004	28	6.3246	0.7
F:\landscape\forest_land	9337	cls_3	0.004	28	6.3246	0.7
F:\landscape\forest_land	9284	cls_3	0.0044	28	6.3246	0.636364
F:\landscape\forest_land	3742	cls_2	0.0052	32	6.3246	0.615385
F:\landscape\forest_land	3983	cls_3	0.0056	32	6.3246	0.571429
F:\landscape\forest_land	1320	cls_1	0.0068	36	6.3246	0.529412
F:\landscape\forest_land	8408	cls_3	0.0068	36	6.3246	0.529412
F:\landscape\forest_land	9383	cls_2	0.0072	36	6.3246	0.5
F:\landscape\forest_land	2970	cls_3	0.0072	36	6.3246	0.5
F:\landscape\forest_land	3281	cls_3	0.0112	44	6.3246	0.392857
F:\landscape\forest_land	396	cls_2	0.0128	48	6.3246	0.375
F:\landscape\forest_land	5371	cls_2	0.0004	8	7.2111	2
F:\landscape\forest_land	11083	cls_3	0.0012	16	7.2111	1.33333
F:\landscape\forest_land	9132	cls_3	0.0032	24	7.2111	0.75
F:\landscape\forest_land	10023	cls_3	0.0032	24	7.2111	0.75
F:\landscape\forest_land	3560	cls_2	0.0036	24	7.2111	0.666667
F:\landscape\forest_land	4038	cls_3	0.004	28	7.2111	0.7
F:\landscape\forest_land	11662	cls_3	0.004	28	7.2111	0.7
F:\landscape\forest_land	8199	cls_2	0.004	28	7.2111	0.7
F:\landscape\forest_land	3672	cls_2	0.0044	28	7.2111	0.636364
F:\landscape\forest_land	9657	cls_3	0.0056	32	7.2111	0.571429
F:\landscape\forest_land	3164	cls_2	0.0068	36	7.2111	0.529412
F:\landscape\forest_land	675	cls_3	0.008	36	7.2111	0.45
F:\landscape\forest_land	2811	cls_4	0.0036	24	8	0.666667
F:\landscape\forest_land	10672	cls_3	0.0032	24	8	0.75
F:\landscape\forest_land	2320	cls_3	0.004	28	8	0.7
F:\landscape\forest_land	8710	cls_3	0.004	28	8	0.7
F:\landscape\forest_land	2947	cls_4	0.004	28	8	0.7
F:\landscape\forest_land	2953	cls_2	0.004	28	8	0.7
F:\landscape\forest_land	7063	cls_3	0.0044	28	8	0.636364
F:\landscape\forest_land	1879	cls_4	0.0044	28	8	0.636364
F:\landscape\forest_land	1468	cls_3	0.0052	32	8	0.615385
F:\landscape\forest_land	350	cls_2	0.004	28	8	0.7
F:\landscape\forest_land	3269	cls_3	0.004	28	8	0.7
F:\landscape\forest_land	9540	cls_1	0.0056	32	8	0.571429
F:\landscape\forest_land	5380	cls_3	0.0056	32	8	0.571429
F:\landscape\forest_land	6297	cls_2	0.006	32	8	0.533333
F:\landscape\forest_land	570	cls_1	0.0172	56	8	0.325581
F:\landscape\forest_land	2691	cls_3	0.018	56	8	0.311111
F:\landscape\forest_land	11339	cls_4	0.0004	8	8.2462	2
F:\landscape\forest_land	8883	cls_2	0.0032	24	8.2462	0.75
F:\landscape\forest_land	1911	cls_3	0.004	28	8.2462	0.7
F:\landscape\forest_land	4554	cls_2	0.0052	32	8.2462	0.615385
F:\landscape\forest_land	8645	cls_3	0.004	28	8.4853	0.7
F:\landscape\forest_land	10721	cls_3	0.0048	28	8.4853	0.583333
F:\landscape\forest_land	6526	cls_2	0.0056	32	8.4853	0.571429
F:\landscape\forest_land	7864	cls_3	0.004	28	8.9443	0.7
F:\landscape\forest_land	914	cls_1	0.004	28	8.9443	0.7
F:\landscape\forest_land	8553	cls_3	0.004	28	8.9443	0.7
F:\landscape\forest_land	4628	cls_3	0.0104	44	8.9443	0.423077
F:\landscape\forest_land	10053	cls_3	0.0036	24	10	0.666667
F:\landscape\forest_land	6639	cls_3	0.0052	32	10	0.615385
F:\landscape\forest_land	3692	cls_1	0.0052	32	10	0.615385
F:\landscape\forest_land	9753	cls_3	0.0088	40	10	0.454545
F:\landscape\forest_land	1013	cls_1	0.0088	40	10	0.454545
F:\landscape\forest_land	9739	cls_3	0.0096	40	10	0.416667
F:\landscape\forest_land	5646	cls_2	0.004	28	10.198	0.7
F:\landscape\forest_land	9343	cls_4	0.0068	36	10.198	0.529412
F:\landscape\forest_land	10961	cls_2	0.0096	40	10.198	0.416667
F:\landscape\forest_land	11805	cls_3	0.0104	44	10.198	0.423077
F:\landscape\forest_land	1322	cls_2	0.0004	8	10.7703	2
F:\landscape\forest_land	4645	cls_4	0.004	28	10.7703	0.7
F:\landscape\forest_land	384	cls_2	0.006	32	11.3137	0.533333
F:\landscape\forest_land	2803	cls_2	0.0004	8	11.6619	2
F:\landscape\forest_land	8482	cls_3	0.0052	32	11.6619	0.615385
F:\landscape\forest_land	2800	cls_4	0.0004	8	12	2
F:\landscape\forest_land	9546	cls_1	0.0036	24	12	0.666667
F:\landscape\forest_land	4673	cls_3	0.0036	24	12	0.666667
F:\landscape\forest_land	870	cls_3	0.0032	24	12	0.75
F:\landscape\forest_land	4813	cls_4	0.004	28	12	0.7
F:\landscape\forest_land	6487	cls_4	0.0052	32	12	0.615385
F:\landscape\forest_land	11198	cls_1	0.0056	32	12	0.571429
F:\landscape\forest_land	11195	cls_2	0.004	28	12.1655	0.7
F:\landscape\forest_land	923	cls_3	0.004	28	12.1655	0.7
F:\landscape\forest_land	227	cls_1	0.0032	24	12.6491	0.75
F:\landscape\forest_land	2028	cls_3	0.0104	44	12.8062	0.423077
F:\landscape\forest_land	2801	cls_4	0.0008	12	13.4164	1.5
F:\landscape\forest_land	10295	cls_2	0.004	28	13.4164	0.7
F:\landscape\forest_land	9692	cls_4	0.004	28	13.4164	0.7
F:\landscape\forest_land	10185	cls_4	0.004	28	13.4164	0.7
F:\landscape\forest_land	9104	cls_3	0.0032	24	14	0.75
F:\landscape\forest_land	9265	cls_3	0.0032	24	14	0.75
F:\landscape\forest_land	2186	cls_2	0.006	32	14	0.533333
F:\landscape\forest_land	1769	cls_4	0.004	28	14.1421	0.7
F:\landscape\forest_land	496	cls_1	0.0124	48	14.1421	0.387097
F:\landscape\forest_land	10135	cls_3	0.004	28	14.5602	0.7
F:\landscape\forest_land	10086	cls_3	0.0072	36	15.6205	0.5
F:\landscape\forest_land	3970	cls_3	0.004	28	16	0.7
F:\landscape\forest_land	1799	cls_4	0.0044	28	16	0.636364
F:\landscape\forest_land	8076	cls_4	0.0052	32	16	0.615385
F:\landscape\forest_land	3555	cls_3	0.006	32	16	0.533333
F:\landscape\forest_land	6407	cls_3	0.0004	8	16.1245	2
F:\landscape\forest_land	4872	cls_3	0.0052	32	16.4924	0.615385
F:\landscape\forest_land	302	cls_2	0.0032	24	17.088	0.75
F:\landscape\forest_land	3632	cls_3	0.004	28	17.088	0.7
F:\landscape\forest_land	8140	cls_4	0.004	28	17.088	0.7
F:\landscape\forest_land	3601	cls_3	0.0052	32	18.1108	0.615385
F:\landscape\forest_land	10667	cls_3	0.006	32	18.4391	0.533333
F:\landscape\forest_land	3699	cls_1	0.0048	28	18.9737	0.583333
F:\landscape\forest_land	10317	cls_3	0.0052	32	18.9737	0.615385
F:\landscape\forest_land	6781	cls_3	0.004	28	19.6977	0.7
F:\landscape\forest_land	4090	cls_2	0.0036	24	20.0998	0.666667
F:\landscape\forest_land	9035	cls_3	0.004	28	20.0998	0.7
F:\landscape\forest_land	4150	cls_2	0.0044	28	20.3961	0.636364
F:\landscape\forest_land	4148	cls_2	0.0068	36	20.3961	0.529412
F:\landscape\forest_land	7763	cls_2	0.0092	40	21.2603	0.434783
F:\landscape\forest_land	5179	cls_3	0.0072	36	22	0.5
F:\landscape\forest_land	4361	cls_3	0.0072	36	23.4094	0.5
F:\landscape\forest_land	3685	cls_3	0.0088	40	24	0.454545
F:\landscape\forest_land	8967	cls_3	0.0052	32	24.0832	0.615385
F:\landscape\forest_land	10588	cls_2	0.004	28	24.7386	0.7
F:\landscape\forest_land	149	cls_2	0.0056	32	25.2982	0.571429
F:\landscape\forest_land	3357	cls_3	0.004	28	25.6125	0.7
F:\landscape\forest_land	4358	cls_2	0.0048	28	26.9072	0.583333
F:\landscape\forest_land	172	cls_3	0.0092	40	27.2029	0.434783
F:\landscape\forest_land	5593	cls_3	0.0056	32	28.8444	0.571429
F:\landscape\forest_land	6950	cls_3	0.004	28	30	0.7
F:\landscape\forest_land	4979	cls_2	0.0136	48	30	0.352941
F:\landscape\forest_land	5146	cls_3	0.0036	24	31.305	0.666667
F:\landscape\forest_land	5347	cls_3	0.0052	32	31.305	0.615385
F:\landscape\forest_land	5004	cls_2	0.004	28	32.0624	0.7
F:\landscape\forest_land	8318	cls_3	0.004	28	32.249	0.7
F:\landscape\forest_land	3349	cls_3	0.006	32	32.5576	0.533333
F:\landscape\forest_land	512	cls_1	0.0088	40	32.8024	0.454545
F:\landscape\forest_land	10077	cls_3	0.0044	28	34	0.636364
F:\landscape\forest_land	11004	cls_3	0.0088	40	36.8782	0.454545
F:\landscape\forest_land	3985	cls_3	0.006	32	37.5766	0.533333
F:\landscape\forest_land	5199	cls_3	0.004	28	37.9473	0.7
F:\landscape\forest_land	3949	cls_3	0.0052	32	38	0.615385
F:\landscape\forest_land	4219	cls_3	0.0052	32	38	0.615385
F:\landscape\forest_land	10785	cls_2	0.0092	40	38.4708	0.434783
F:\landscape\forest_land	10530	cls_3	0.0044	28	40.4969	0.636364
F:\landscape\forest_land	7596	cls_3	0.004	28	42	0.7
F:\landscape\forest_land	9259	cls_3	0.0052	32	42	0.615385
F:\landscape\forest_land	3176	cls_3	0.0056	32	45.3431	0.571429
F:\landscape\forest_land	9410	cls_4	0.004	28	45.6946	0.7
F:\landscape\forest_land	9012	cls_3	0.0032	24	46.1736	0.75
F:\landscape\forest_land	7103	cls_3	0.0056	32	46.6905	0.571429
F:\landscape\forest_land	6304	cls_3	0.006	32	48.0833	0.533333
F:\landscape\forest_land	3739	cls_3	0.0072	36	51.1077	0.5
F:\landscape\forest_land	8143	cls_3	0.0036	24	52.8394	0.666667
F:\landscape\forest_land	4347	cls_1	0.0052	32	54.5894	0.615385
F:\landscape\forest_land	4162	cls_2	0.0044	28	60.7289	0.636364
F:\landscape\forest_land	4118	cls_3	0.0084	40	66	0.47619
F:\landscape\forest_land	4448	cls_2	0.0036	24	69.6563	0.666667
F:\landscape\forest_land	8340	cls_3	0.0052	32	69.7711	0.615385
F:\landscape\forest_land	8372	cls_3	0.0128	48	70.7107	0.375
F:\landscape\forest_land	8354	cls_3	0.018	56	70.7107	0.311111
F:\landscape\forest_land	10651	cls_3	0.0036	24	75.71	0.666667
F:\landscape\forest_land	8879	cls_3	0.0044	28	78.2304	0.636364
F:\landscape\forest_land	2546	cls_3	0.004	28	78.8162	0.7
F:\landscape\forest_land	3279	cls_2	0.004	28	85.5102	0.7
F:\landscape\forest_land	4012	cls_3	0.0048	28	86.8332	0.583333
F:\landscape\forest_land	138	cls_2	0.0036	24	90.7083	0.666667
F:\landscape\forest_land	4807	cls_3	0.0052	32	92.7793	0.615385
F:\landscape\forest_land	3023	cls_2	0.0068	36	96.7471	0.529412
F:\landscape\forest_land	8914	cls_3	0.0032	24	106.302	0.75
F:\landscape\forest_land	3740	cls_2	0.0048	28	108.166	0.583333
F:\landscape\forest_land	3313	cls_3	0.004	28	109.124	0.7
F:\landscape\forest_land	9930	cls_3	0.004	28	120.283	0.7
F:\landscape\forest_land	5668	cls_3	0.0064	32	122.066	0.5
F:\landscape\forest_land	3537	cls_3	0.0036	24	129.259	0.666667
F:\landscape\forest_land	3220	cls_3	0.0088	40	129.259	0.454545
F:\landscape\forest_land	7290	cls_3	0.0052	32	155.756	0.615385
F:\landscape\forest_land	6621	cls_3	0.0104	44	156.461	0.423077
F:\landscape\forest_land	8783	cls_3	0.0032	24	202.386	0.75
F:\landscape\forest_land	6001	cls_3	0.0052	32	210.95	0.615385
F:\landscape\forest_land	2812	cls_3	0.0148	52	223.946	0.351351
F:\landscape\forest_land	10970	cls_3	0.004	28	422.057	0.7
F:\landscape\forest_land	9122	cls_3	0.0436	88	8	0.201835
F:\landscape\forest_land	468	cls_2	0.042	88	8	0.209524
F:\landscape\forest_land	3855	cls_3	0.0408	88	22	0.215686
F:\landscape\forest_land	3723	cls_3	0.1648	172	26.0768	0.104369
F:\landscape\forest_land	6294	cls_1	0.0328	80	12.1655	0.243902
F:\landscape\forest_land	3881	cls_3	0.0352	80	22	0.227273
F:\landscape\forest_land	556	cls_1	0.0344	80	82.4621	0.232558
F:\landscape\forest_land	6808	cls_3	0.03	76	14.1421	0.253333
F:\landscape\forest_land	3452	cls_2	0.0264	72	17.2047	0.272727
F:\landscape\forest_land	8129	cls_3	0.026	72	18.4391	0.276923
F:\landscape\forest_land	8473	cls_2	0.0272	72	22	0.264706
F:\landscape\forest_land	3004	cls_3	0.0268	72	22.3607	0.268657
F:\landscape\forest_land	3589	cls_2	0.0284	72	56.0357	0.253521
F:\landscape\forest_land	9269	cls_3	0.0232	68	4.4721	0.293103
F:\landscape\forest_land	10423	cls_3	0.0232	68	8	0.293103
F:\landscape\forest_land	3129	cls_2	0.024	68	26.9072	0.283333
F:\landscape\forest_land	3690	cls_3	0.0232	68	30	0.293103
F:\landscape\forest_land	3664	cls_2	0.02	64	6.3246	0.32
F:\landscape\forest_land	9151	cls_3	0.022	64	8	0.290909
F:\landscape\forest_land	6614	cls_2	0.0208	64	8	0.307692
F:\landscape\forest_land	8194	cls_4	0.0212	64	8.4853	0.301887
F:\landscape\forest_land	4959	cls_1	0.0204	64	8.9443	0.313725
F:\landscape\forest_land	9400	cls_3	0.022	64	14	0.290909
F:\landscape\forest_land	11666	cls_3	0.02	64	14.5602	0.32
F:\landscape\forest_land	1422	cls_2	0.0868	128	16	0.147465
F:\landscape\forest_land	9111	cls_2	0.02	64	18	0.32
F:\landscape\forest_land	3545	cls_3	0.0208	64	20.8806	0.307692
F:\landscape\forest_land	10801	cls_3	0.018	60	4.4721	0.333333
F:\landscape\forest_land	3306	cls_3	0.0188	60	6	0.319149
F:\landscape\forest_land	378	cls_1	0.0748	120	7.2111	0.160428
F:\landscape\forest_land	406	cls_2	0.0184	60	8.9443	0.326087
F:\landscape\forest_land	4771	cls_2	0.0172	60	12	0.348837
F:\landscape\forest_land	6264	cls_1	0.018	60	12.8062	0.333333
F:\landscape\forest_land	592	cls_1	0.0176	60	20	0.340909
F:\landscape\forest_land	11105	cls_3	0.018	60	52.1536	0.333333
F:\landscape\forest_land	11728	cls_3	0.0176	60	86.5563	0.340909
F:\landscape\forest_land	3750	cls_3	0.018	60	96.6644	0.333333
F:\landscape\forest_land	3222	cls_2	0.0156	56	4.4721	0.358974
F:\landscape\forest_land	2754	cls_4	0.0148	56	5.6569	0.378378
F:\landscape\forest_land	424	cls_2	0.0148	56	8	0.378378
F:\landscape\forest_land	11063	cls_1	0.0164	56	8.9443	0.341463
F:\landscape\forest_land	11494	cls_2	0.0156	56	10	0.358974
F:\landscape\forest_land	11287	cls_3	0.0164	56	10	0.341463
F:\landscape\forest_land	7201	cls_3	0.0148	56	16.1245	0.378378
F:\landscape\forest_land	4326	cls_3	0.0148	56	18.4391	0.378378
F:\landscape\forest_land	5443	cls_2	0.0152	56	20	0.368421
F:\landscape\forest_land	7216	cls_3	0.0156	56	25.0599	0.358974
F:\landscape\forest_land	4971	cls_1	0.0148	56	36.8782	0.378378
F:\landscape\forest_land	10457	cls_3	0.0148	56	87.2009	0.378378
F:\landscape\forest_land	5029	cls_1	0.152	168	259.384	0.110526
F:\landscape\forest_land	9272	cls_3	0.058	108	8	0.186207
F:\landscape\forest_land	6118	cls_3	0.0128	52	4	0.40625
F:\landscape\forest_land	2977	cls_3	0.0132	52	4.4721	0.393939
F:\landscape\forest_land	4097	cls_3	0.0128	52	5.6569	0.40625
F:\landscape\forest_land	10223	cls_1	0.0124	52	6	0.419355
F:\landscape\forest_land	407	cls_2	0.0144	52	6	0.361111
F:\landscape\forest_land	7770	cls_3	0.0124	52	7.2111	0.419355
F:\landscape\forest_land	2989	cls_3	0.014	52	7.2111	0.371429
F:\landscape\forest_land	9541	cls_1	0.0124	52	8	0.419355
F:\landscape\forest_land	429	cls_2	0.0136	52	8	0.382353
F:\landscape\forest_land	11282	cls_3	0.0124	52	8.9443	0.419355
F:\landscape\forest_land	5833	cls_2	0.0124	52	10	0.419355
F:\landscape\forest_land	393	cls_2	0.0132	52	11.3137	0.393939
F:\landscape\forest_land	7084	cls_3	0.0548	104	11.6619	0.189781
F:\landscape\forest_land	6075	cls_3	0.0124	52	12	0.419355
F:\landscape\forest_land	4319	cls_2	0.0124	52	12.8062	0.419355
F:\landscape\forest_land	6555	cls_2	0.0128	52	16.1245	0.40625
F:\landscape\forest_land	4072	cls_2	0.0136	52	16.4924	0.382353
F:\landscape\forest_land	4056	cls_2	0.0124	52	16.4924	0.419355
F:\landscape\forest_land	3122	cls_2	0.0124	52	26.9072	0.419355
F:\landscape\forest_land	7612	cls_3	0.056	104	30	0.185714
F:\landscape\forest_land	5157	cls_3	0.0124	52	38.833	0.419355
F:\landscape\forest_land	3552	cls_3	0.0144	52	50	0.361111
F:\landscape\forest_land	3790	cls_3	0.0132	52	69.6563	0.393939
F:\landscape\forest_land	11200	cls_3	0.0132	52	84.214	0.393939
F:\landscape\forest_land	7028	cls_3	0.014	52	86.764	0.371429
F:\landscape\forest_land	9621	cls_3	0.014	52	93.6376	0.371429
F:\landscape\forest_land	5844	cls_3	0.0124	52	99.5389	0.419355
F:\landscape\forest_land	11389	cls_3	0.0572	104	462.709	0.181818
F:\landscape\forest_land	1560	cls_3	0.0104	48	4	0.461538
F:\landscape\forest_land	6246	cls_1	0.0108	48	4.4721	0.444444
F:\landscape\forest_land	6252	cls_1	0.0112	48	4.4721	0.428571
F:\landscape\forest_land	5587	cls_2	0.0108	48	4.4721	0.444444
F:\landscape\forest_land	8683	cls_3	0.0112	48	6	0.428571
F:\landscape\forest_land	7165	cls_2	0.012	48	6	0.4
F:\landscape\forest_land	5135	cls_3	0.0108	48	6.3246	0.444444
F:\landscape\forest_land	1472	cls_3	0.0104	48	8	0.461538
F:\landscape\forest_land	7607	cls_3	0.0108	48	8.2462	0.444444
F:\landscape\forest_land	7034	cls_3	0.0108	48	8.9443	0.444444
F:\landscape\forest_land	5658	cls_3	0.0108	48	10	0.444444
F:\landscape\forest_land	11801	cls_3	0.0112	48	10.198	0.428571
F:\landscape\forest_land	602	cls_2	0.0112	48	12	0.428571
F:\landscape\forest_land	9548	cls_3	0.0104	48	14	0.461538
F:\landscape\forest_land	9059	cls_4	0.0108	48	16	0.444444
F:\landscape\forest_land	10433	cls_2	0.0468	96	17.088	0.205128
F:\landscape\forest_land	9381	cls_4	0.012	48	18.4391	0.4
F:\landscape\forest_land	2932	cls_3	0.0116	48	18.868	0.413793
F:\landscape\forest_land	9768	cls_3	0.0116	48	19.6977	0.413793
F:\landscape\forest_land	6770	cls_3	0.012	48	22	0.4
F:\landscape\forest_land	6604	cls_2	0.0112	48	28.4253	0.428571
F:\landscape\forest_land	6878	cls_3	0.0452	96	29.5296	0.212389
F:\landscape\forest_land	4080	cls_2	0.0108	48	30.4631	0.444444
F:\landscape\forest_land	2137	cls_3	0.0108	48	34.4093	0.444444
F:\landscape\forest_land	8336	cls_3	0.048	96	34.5254	0.2
F:\landscape\forest_land	7888	cls_2	0.0112	48	38	0.428571
F:\landscape\forest_land	8361	cls_3	0.0468	96	72.2772	0.205128
F:\landscape\forest_land	11239	cls_3	0.0108	48	83.5464	0.444444
F:\landscape\forest_land	5141	cls_3	0.0112	48	99.4585	0.428571
F:\landscape\forest_land	7936	cls_3	0.0116	48	100	0.413793
F:\landscape\forest_land	4622	cls_2	0.0108	48	228.114	0.444444
F:\landscape\forest_land	6425	cls_3	0.0112	48	246.008	0.428571
F:\landscape\forest_land	3398	cls_2	0.1	140	12	0.14
F:\landscape\forest_land	3548	cls_2	0.0404	92	50	0.227723
F:\landscape\forest_land	9287	cls_3	0.0924	136	18	0.147186
F:\landscape\forest_land	11013	cls_4	1.0336	448	90.5539	0.0433437
F:\landscape\forest_land	8158	cls_3	0.0088	44	4	0.5
F:\landscape\forest_land	7641	cls_3	0.0088	44	4	0.5
F:\landscape\forest_land	10945	cls_3	0.0096	44	4	0.458333
F:\landscape\forest_land	7867	cls_3	0.0092	44	4	0.478261
F:\landscape\forest_land	2618	cls_4	0.0084	44	4.4721	0.52381
F:\landscape\forest_land	3844	cls_3	0.0084	44	5.6569	0.52381
F:\landscape\forest_land	3608	cls_2	0.0092	44	5.6569	0.478261
F:\landscape\forest_land	9843	cls_3	0.0084	44	6	0.52381
F:\landscape\forest_land	5888	cls_3	0.0088	44	6	0.5
F:\landscape\forest_land	3694	cls_1	0.0096	44	6.3246	0.458333
F:\landscape\forest_land	3678	cls_1	0.01	44	6.3246	0.44
F:\landscape\forest_land	5310	cls_2	0.0088	44	7.2111	0.5
F:\landscape\forest_land	6057	cls_3	0.0096	44	7.2111	0.458333
F:\landscape\forest_land	611	cls_1	0.0096	44	7.2111	0.458333
F:\landscape\forest_land	8407	cls_1	0.0084	44	8	0.52381
F:\landscape\forest_land	3781	cls_3	0.0084	44	8	0.52381
F:\landscape\forest_land	8684	cls_3	0.0084	44	8	0.52381
F:\landscape\forest_land	9049	cls_3	0.0392	88	8	0.22449
F:\landscape\forest_land	8627	cls_4	0.0092	44	8.4853	0.478261
F:\landscape\forest_land	10081	cls_3	0.0084	44	8.9443	0.52381
F:\landscape\forest_land	3671	cls_3	0.0084	44	10	0.52381
F:\landscape\forest_land	5472	cls_2	0.0088	44	10.7703	0.5
F:\landscape\forest_land	4013	cls_3	0.0088	44	11.3137	0.5
F:\landscape\forest_land	5344	cls_3	0.0096	44	11.3137	0.458333
F:\landscape\forest_land	3968	cls_3	0.01	44	12	0.44
F:\landscape\forest_land	5951	cls_3	0.0088	44	13.4164	0.5
F:\landscape\forest_land	10489	cls_3	0.0084	44	16	0.52381
F:\landscape\forest_land	4999	cls_3	0.0084	44	16	0.52381
F:\landscape\forest_land	6141	cls_2	0.04	88	16	0.22
F:\landscape\forest_land	2646	cls_3	0.0372	88	17.088	0.236559
F:\landscape\forest_land	9027	cls_3	0.0096	44	18	0.458333
F:\landscape\forest_land	6466	cls_3	0.0084	44	20	0.52381
F:\landscape\forest_land	4135	cls_2	0.0088	44	25.6125	0.5
F:\landscape\forest_land	5026	cls_3	0.0084	44	26	0.52381
F:\landscape\forest_land	10075	cls_3	0.0372	88	26	0.236559
F:\landscape\forest_land	4278	cls_1	0.0084	44	27.7849	0.52381
F:\landscape\forest_land	3777	cls_3	0.0384	88	28.2843	0.229167
F:\landscape\forest_land	7890	cls_3	0.1528	176	28.8444	0.115183
F:\landscape\forest_land	7795	cls_3	0.0092	44	30.4631	0.478261
F:\landscape\forest_land	4077	cls_3	0.0084	44	31.305	0.52381
F:\landscape\forest_land	10476	cls_3	0.0364	88	31.6228	0.241758
F:\landscape\forest_land	5457	cls_3	0.0088	44	32	0.5
F:\landscape\forest_land	5217	cls_3	0.0084	44	32.249	0.52381
F:\landscape\forest_land	5625	cls_3	0.0084	44	32.8024	0.52381
F:\landscape\forest_land	8097	cls_2	0.0088	44	33.2866	0.5
F:\landscape\forest_land	6392	cls_3	0.0084	44	34.5254	0.52381
F:\landscape\forest_land	2603	cls_3	0.04	88	46.1736	0.22
F:\landscape\forest_land	888	cls_3	0.01	44	46.6476	0.44
F:\landscape\forest_land	7133	cls_2	0.0096	44	52.8394	0.458333
F:\landscape\forest_land	6778	cls_2	0.0088	44	62.6418	0.5
F:\landscape\forest_land	4321	cls_3	0.0088	44	62.8013	0.5
F:\landscape\forest_land	2985	cls_3	0.038	88	66.4831	0.231579
F:\landscape\forest_land	9137	cls_3	0.0088	44	68.7314	0.5
F:\landscape\forest_land	7742	cls_2	0.0084	44	69.4262	0.52381
F:\landscape\forest_land	7056	cls_3	0.0084	44	118.962	0.52381
F:\landscape\forest_land	3980	cls_2	0.01	44	167.452	0.44
F:\landscape\forest_land	3628	cls_2	0.0084	44	174.413	0.52381
F:\landscape\forest_land	3089	cls_3	0.01	44	205.105	0.44
F:\landscape\forest_land	4062	cls_3	0.0092	44	252.42	0.478261
F:\landscape\forest_land	3562	cls_3	0.01	44	274.875	0.44
F:\landscape\forest_land	3128	cls_3	0.0084	44	360.028	0.52381
F:\landscape\forest_land	7772	cls_3	0.0328	84	12	0.256098
F:\landscape\forest_land	11518	cls_2	0.036	84	18	0.233333
F:\landscape\forest_land	11328	cls_3	0.0336	84	28	0.25
F:\landscape\forest_land	11849	cls_2	0.57	336	104.709	0.0589474
F:\landscape\forest_land	11661	cls_3	0.0748	124	14.5602	0.165775
F:\landscape\forest_land	9832	cls_3	0.2952	244	17.088	0.0826558
F:\landscape\forest_land	8330	cls_3	0.0072	40	4	0.555556
F:\landscape\forest_land	2577	cls_4	0.0072	40	4	0.555556
F:\landscape\forest_land	1946	cls_3	0.0076	40	4	0.526316
F:\landscape\forest_land	3928	cls_2	0.0068	40	4	0.588235
F:\landscape\forest_land	10029	cls_1	0.0068	40	4	0.588235
F:\landscape\forest_land	8259	cls_3	0.008	40	4	0.5
F:\landscape\forest_land	4609	cls_4	0.0068	40	4	0.588235
F:\landscape\forest_land	7278	cls_3	0.0072	40	4	0.555556
F:\landscape\forest_land	4093	cls_2	0.0076	40	4	0.526316
F:\landscape\forest_land	9969	cls_3	0.0068	40	4	0.588235
F:\landscape\forest_land	10603	cls_3	0.0076	40	4	0.526316
F:\landscape\forest_land	10071	cls_3	0.0068	40	4.4721	0.588235
F:\landscape\forest_land	8984	cls_3	0.0068	40	4.4721	0.588235
F:\landscape\forest_land	2976	cls_3	0.008	40	4.4721	0.5
F:\landscape\forest_land	7146	cls_3	0.0068	40	5.6569	0.588235
F:\landscape\forest_land	3390	cls_3	0.0072	40	5.6569	0.555556
F:\landscape\forest_land	3879	cls_2	0.0072	40	5.6569	0.555556
F:\landscape\forest_land	10017	cls_3	0.0068	40	6	0.588235
F:\landscape\forest_land	8063	cls_3	0.0076	40	6	0.526316
F:\landscape\forest_land	2802	cls_4	0.0068	40	6	0.588235
F:\landscape\forest_land	2697	cls_4	0.0068	40	6	0.588235
F:\landscape\forest_land	6538	cls_3	0.0076	40	6	0.526316
F:\landscape\forest_land	3885	cls_2	0.0072	40	6.3246	0.555556
F:\landscape\forest_land	8416	cls_3	0.0076	40	6.3246	0.526316
F:\landscape\forest_land	8025	cls_2	0.0076	40	6.3246	0.526316
F:\landscape\forest_land	5482	cls_2	0.0068	40	6.3246	0.588235
F:\landscape\forest_land	2043	cls_2	0.008	40	6.3246	0.5
F:\landscape\forest_land	2699	cls_4	0.0076	40	6.3246	0.526316
F:\landscape\forest_land	1965	cls_3	0.0068	40	7.2111	0.588235
F:\landscape\forest_land	411	cls_2	0.032	80	7.2111	0.25
F:\landscape\forest_land	1918	cls_4	0.0072	40	8	0.555556
F:\landscape\forest_land	9131	cls_3	0.0068	40	8	0.588235
F:\landscape\forest_land	6819	cls_3	0.0072	40	8	0.555556
F:\landscape\forest_land	2696	cls_3	0.008	40	8	0.5
F:\landscape\forest_land	8356	cls_3	0.008	40	8	0.5
F:\landscape\forest_land	6134	cls_2	0.0068	40	8	0.588235
F:\landscape\forest_land	3617	cls_3	0.0072	40	8.2462	0.555556
F:\landscape\forest_land	6497	cls_3	0.0068	40	8.9443	0.588235
F:\landscape\forest_land	9961	cls_3	0.0068	40	10	0.588235
F:\landscape\forest_land	10758	cls_3	0.0072	40	10	0.555556
F:\landscape\forest_land	6031	cls_2	0.0068	40	10	0.588235
F:\landscape\forest_land	6643	cls_3	0.0076	40	10	0.526316
F:\landscape\forest_land	7214	cls_3	0.008	40	10.198	0.5
F:\landscape\forest_land	2648	cls_4	0.0068	40	10.7703	0.588235
F:\landscape\forest_land	1772	cls_3	0.0076	40	11.3137	0.526316
F:\landscape\forest_land	6419	cls_4	0.0072	40	12	0.555556
F:\landscape\forest_land	6561	cls_3	0.0068	40	12.1655	0.588235
F:\landscape\forest_land	9180	cls_3	0.0076	40	12.6491	0.526316
F:\landscape\forest_land	5568	cls_3	0.0072	40	12.6491	0.555556
F:\landscape\forest_land	8836	cls_3	0.0076	40	13.4164	0.526316
F:\landscape\forest_land	7833	cls_2	0.008	40	14	0.5
F:\landscape\forest_land	4962	cls_2	0.0068	40	14.1421	0.588235
F:\landscape\forest_land	2742	cls_2	0.008	40	16	0.5
F:\landscape\forest_land	427	cls_2	0.03	80	16	0.266667
F:\landscape\forest_land	6833	cls_3	0.0068	40	16.4924	0.588235
F:\landscape\forest_land	168	cls_3	0.0072	40	17.2047	0.555556
F:\landscape\forest_land	6791	cls_3	0.0068	40	17.8885	0.588235
F:\landscape\forest_land	10791	cls_2	0.0068	40	17.8885	0.588235
F:\landscape\forest_land	1987	cls_2	0.008	40	18.9737	0.5
F:\landscape\forest_land	10586	cls_3	0.0076	40	19.6977	0.526316
F:\landscape\forest_land	5688	cls_3	0.1232	160	19.6977	0.12987
F:\landscape\forest_land	10763	cls_3	0.0068	40	20	0.588235
F:\landscape\forest_land	11254	cls_2	0.0316	80	20.5913	0.253165
F:\landscape\forest_land	7425	cls_3	0.0072	40	23.3238	0.555556
F:\landscape\forest_land	3680	cls_3	0.032	80	24	0.25
F:\landscape\forest_land	8398	cls_2	0.0076	40	26	0.526316
F:\landscape\forest_land	2827	cls_2	0.0072	40	29.7321	0.555556
F:\landscape\forest_land	9161	cls_3	0.0072	40	32.5576	0.555556
F:\landscape\forest_land	9054	cls_3	0.0076	40	34.0588	0.526316
F:\landscape\forest_land	4007	cls_3	0.0076	40	37.5766	0.526316
F:\landscape\forest_land	6247	cls_3	0.008	40	39.8497	0.5
F:\landscape\forest_land	4524	cls_1	0.1248	160	41.6173	0.128205
F:\landscape\forest_land	10160	cls_3	0.0068	40	42.5206	0.588235
F:\landscape\forest_land	5903	cls_3	0.0072	40	43.1741	0.555556
F:\landscape\forest_land	6720	cls_3	0.0068	40	49.679	0.588235
F:\landscape\forest_land	3571	cls_2	0.0324	80	50.9902	0.246914
F:\landscape\forest_land	3877	cls_2	0.0076	40	52.4976	0.526316
F:\landscape\forest_land	1770	cls_3	0.0072	40	53.8145	0.555556
F:\landscape\forest_land	11813	cls_1	0.03	80	58	0.266667
F:\landscape\forest_land	8490	cls_3	0.1944	200	66.242	0.102881
F:\landscape\forest_land	5062	cls_2	0.0068	40	68.4105	0.588235
F:\landscape\forest_land	4957	cls_3	0.0068	40	68.9638	0.588235
F:\landscape\forest_land	9370	cls_3	0.0076	40	71.8053	0.526316
F:\landscape\forest_land	1638	cls_3	0.0068	40	77.201	0.588235
F:\landscape\forest_land	11658	cls_3	0.0304	80	78.1025	0.263158
F:\landscape\forest_land	9304	cls_3	0.0312	80	81.2158	0.25641
F:\landscape\forest_land	7805	cls_3	0.0072	40	84.8528	0.555556
F:\landscape\forest_land	2755	cls_3	0.0068	40	90	0.588235
F:\landscape\forest_land	3811	cls_3	0.0068	40	104.173	0.588235
F:\landscape\forest_land	4405	cls_3	0.0072	40	122.931	0.555556
F:\landscape\forest_land	7782	cls_3	0.0072	40	145.231	0.555556
F:\landscape\forest_land	8545	cls_2	0.0072	40	155.602	0.555556
F:\landscape\forest_land	4269	cls_2	0.0076	40	162.69	0.526316
F:\landscape\forest_land	6658	cls_3	0.008	40	217.007	0.5
F:\landscape\forest_land	6190	cls_1	0.0708	120	254.118	0.169492
F:\landscape\forest_land	5633	cls_3	0.008	40	280.528	0.5
F:\landscape\forest_land	10988	cls_3	0.1872	196	25.4558	0.104701
F:\landscape\forest_land	46	cls_3	0.1856	196	205.222	0.105603
F:\landscape\forest_land	8730	cls_3	0.12	156	14	0.13
F:\landscape\forest_land	8507	cls_3	0.122	156	16	0.127869
F:\landscape\forest_land	4638	cls_3	0.0668	116	10	0.173653
F:\landscape\forest_land	8103	cls_4	0.0284	76	5.6569	0.267606
F:\landscape\forest_land	6438	cls_2	0.026	76	6.3246	0.292308
F:\landscape\forest_land	11613	cls_3	0.0264	76	10	0.287879
F:\landscape\forest_land	11844	cls_1	0.0264	76	14	0.287879
F:\landscape\forest_land	8433	cls_2	0.0288	76	16.1245	0.263889
F:\landscape\forest_land	3677	cls_2	0.0284	76	18.4391	0.267606
F:\landscape\forest_land	8643	cls_3	0.0264	76	28.0713	0.287879
F:\landscape\forest_land	4904	cls_3	0.0288	76	45.607	0.263889
F:\landscape\forest_land	10366	cls_3	0.1104	152	45.607	0.137681
F:\landscape\forest_land	9123	cls_3	0.1712	188	8	0.109813
F:\landscape\forest_land	3051	cls_3	0.2396	220	285.391	0.0918197
F:\landscape\forest_land	5416	cls_3	0.0052	36	4	0.692308
F:\landscape\forest_land	2343	cls_3	0.0052	36	4	0.692308
F:\landscape\forest_land	1634	cls_3	0.0056	36	4	0.642857
F:\landscape\forest_land	8938	cls_3	0.0056	36	4	0.642857
F:\landscape\forest_land	2495	cls_3	0.0056	36	4	0.642857
F:\landscape\forest_land	4144	cls_2	0.0056	36	4	0.642857
F:\landscape\forest_land	4185	cls_3	0.0052	36	4	0.692308
F:\landscape\forest_land	5739	cls_2	0.0056	36	4	0.642857
F:\landscape\forest_land	5574	cls_2	0.0052	36	4	0.692308
F:\landscape\forest_land	5279	cls_3	0.0052	36	4.4721	0.692308
F:\landscape\forest_land	2765	cls_4	0.006	36	4.4721	0.6
F:\landscape\forest_land	9691	cls_3	0.0056	36	4.4721	0.642857
F:\landscape\forest_land	9108	cls_3	0.0064	36	4.4721	0.5625
F:\landscape\forest_land	1323	cls_1	0.0064	36	4.4721	0.5625
F:\landscape\forest_land	389	cls_2	0.0052	36	4.4721	0.692308
F:\landscape\forest_land	9252	cls_3	0.0256	72	4.4721	0.28125
F:\landscape\forest_land	1794	cls_3	0.0052	36	5.6569	0.692308
F:\landscape\forest_land	2778	cls_2	0.0052	36	5.6569	0.692308
F:\landscape\forest_land	7611	cls_3	0.0056	36	5.6569	0.642857
F:\landscape\forest_land	3634	cls_2	0.0052	36	5.6569	0.692308
F:\landscape\forest_land	6469	cls_3	0.006	36	5.6569	0.6
F:\landscape\forest_land	3655	cls_2	0.0056	36	6	0.642857
F:\landscape\forest_land	2537	cls_3	0.0052	36	6	0.692308
F:\landscape\forest_land	8065	cls_4	0.006	36	6	0.6
F:\landscape\forest_land	3503	cls_4	0.006	36	6	0.6
F:\landscape\forest_land	4130	cls_3	0.0052	36	6	0.692308
F:\landscape\forest_land	4232	cls_2	0.0064	36	6	0.5625
F:\landscape\forest_land	337	cls_2	0.0064	36	6	0.5625
F:\landscape\forest_land	5102	cls_3	0.0064	36	6	0.5625
F:\landscape\forest_land	5014	cls_2	0.0056	36	6	0.642857
F:\landscape\forest_land	5953	cls_2	0.0236	72	6	0.305085
F:\landscape\forest_land	6023	cls_3	0.0052	36	6.3246	0.692308
F:\landscape\forest_land	8043	cls_4	0.0052	36	6.3246	0.692308
F:\landscape\forest_land	2799	cls_4	0.0064	36	6.3246	0.5625
F:\landscape\forest_land	3667	cls_2	0.0064	36	6.3246	0.5625
F:\landscape\forest_land	8021	cls_4	0.0064	36	6.3246	0.5625
F:\landscape\forest_land	7870	cls_3	0.006	36	6.3246	0.6
F:\landscape\forest_land	2768	cls_4	0.0052	36	7.2111	0.692308
F:\landscape\forest_land	3288	cls_3	0.0052	36	7.2111	0.692308
F:\landscape\forest_land	10015	cls_3	0.0052	36	7.2111	0.692308
F:\landscape\forest_land	3903	cls_2	0.0052	36	7.2111	0.692308
F:\landscape\forest_land	461	cls_1	0.006	36	7.2111	0.6
F:\landscape\forest_land	3709	cls_2	0.0052	36	7.2111	0.692308
F:\landscape\forest_land	6822	cls_3	0.0056	36	7.2111	0.642857
F:\landscape\forest_land	4041	cls_3	0.0064	36	7.2111	0.5625
F:\landscape\forest_land	1887	cls_4	0.0056	36	7.2111	0.642857
F:\landscape\forest_land	5021	cls_3	0.0052	36	8	0.692308
F:\landscape\forest_land	8276	cls_4	0.0052	36	8	0.692308
F:\landscape\forest_land	5000	cls_3	0.0052	36	8	0.692308
F:\landscape\forest_land	7905	cls_3	0.006	36	8	0.6
F:\landscape\forest_land	3029	cls_2	0.0064	36	8	0.5625
F:\landscape\forest_land	5033	cls_3	0.0064	36	8	0.5625
F:\landscape\forest_land	11032	cls_3	0.024	72	8	0.3
F:\landscape\forest_land	9898	cls_2	0.0056	36	8.2462	0.642857
F:\landscape\forest_land	5534	cls_2	0.0052	36	8.2462	0.692308
F:\landscape\forest_land	11222	cls_1	0.0064	36	8.2462	0.5625
F:\landscape\forest_land	9758	cls_3	0.0248	72	8.4853	0.290323
F:\landscape\forest_land	418	cls_2	0.0256	72	8.9443	0.28125
F:\landscape\forest_land	11289	cls_3	0.0064	36	10	0.5625
F:\landscape\forest_land	585	cls_2	0.0064	36	10	0.5625
F:\landscape\forest_land	5797	cls_3	0.0052	36	10	0.692308
F:\landscape\forest_land	4848	cls_2	0.0244	72	10	0.295082
F:\landscape\forest_land	9116	cls_3	0.0992	144	10	0.145161
F:\landscape\forest_land	9557	cls_3	0.006	36	10.7703	0.6
F:\landscape\forest_land	6474	cls_3	0.0064	36	10.7703	0.5625
F:\landscape\forest_land	6464	cls_3	0.0064	36	10.7703	0.5625
F:\landscape\forest_land	3186	cls_4	0.0052	36	11.3137	0.692308
F:\landscape\forest_land	2231	cls_2	0.006	36	12	0.6
F:\landscape\forest_land	3207	cls_3	0.006	36	12	0.6
F:\landscape\forest_land	6390	cls_3	0.006	36	12.6491	0.6
F:\landscape\forest_land	7029	cls_3	0.0064	36	12.6491	0.5625
F:\landscape\forest_land	9155	cls_3	0.0576	108	12.6491	0.1875
F:\landscape\forest_land	6265	cls_3	0.0056	36	12.8062	0.642857
F:\landscape\forest_land	6352	cls_2	0.0052	36	13.4164	0.692308
F:\landscape\forest_land	6282	cls_1	0.0244	72	13.4164	0.295082
F:\landscape\forest_land	9198	cls_3	0.1024	144	14	0.140625
F:\landscape\forest_land	9732	cls_4	0.0064	36	14.1421	0.5625
F:\landscape\forest_land	8591	cls_4	0.006	36	14.4222	0.6
F:\landscape\forest_land	7779	cls_2	0.0056	36	15.6205	0.642857
F:\landscape\forest_land	3876	cls_3	0.0052	36	16	0.692308
F:\landscape\forest_land	3443	cls_2	0.0052	36	16	0.692308
F:\landscape\forest_land	2740	cls_2	0.024	72	16	0.3
F:\landscape\forest_land	9684	cls_3	0.1	144	17.088	0.144
F:\landscape\forest_land	9288	cls_3	0.0976	144	18	0.147541
F:\landscape\forest_land	4907	cls_3	0.0064	36	18.1108	0.5625
F:\landscape\forest_land	1587	cls_2	0.056	108	18.1108	0.192857
F:\landscape\forest_land	6289	cls_2	0.0056	36	18.868	0.642857
F:\landscape\forest_land	11526	cls_1	0.0552	108	20	0.195652
F:\landscape\forest_land	8736	cls_2	0.0052	36	20.0998	0.692308
F:\landscape\forest_land	154	cls_2	0.0064	36	20.0998	0.5625
F:\landscape\forest_land	3663	cls_3	0.024	72	22	0.3
F:\landscape\forest_land	1700	cls_4	0.0056	36	22.0907	0.642857
F:\landscape\forest_land	6543	cls_3	0.0056	36	22.8035	0.642857
F:\landscape\forest_land	8157	cls_3	0.006	36	24.3311	0.6
F:\landscape\forest_land	11561	cls_3	0.0052	36	25.4558	0.692308
F:\landscape\forest_land	3534	cls_2	0.0052	36	25.4558	0.692308
F:\landscape\forest_land	5079	cls_2	0.0052	36	26	0.692308
F:\landscape\forest_land	4224	cls_3	0.0056	36	27.8568	0.642857
F:\landscape\forest_land	2702	cls_4	0.0064	36	28.2843	0.5625
F:\landscape\forest_land	6602	cls_2	0.006	36	28.6356	0.6
F:\landscape\forest_land	3864	cls_3	0.006	36	30	0.6
F:\landscape\forest_land	4981	cls_2	0.006	36	30	0.6
F:\landscape\forest_land	3764	cls_3	0.0056	36	30.0666	0.642857
F:\landscape\forest_land	3559	cls_3	0.006	36	32.249	0.6
F:\landscape\forest_land	2651	cls_3	0.0256	72	35.4401	0.28125
F:\landscape\forest_land	8858	cls_3	0.0056	36	36	0.642857
F:\landscape\forest_land	1334	cls_1	0.006	36	37.2022	0.6
F:\landscape\forest_land	2283	cls_3	0.0236	72	37.2022	0.305085
F:\landscape\forest_land	9016	cls_3	0.0056	36	39.2938	0.642857
F:\landscape\forest_land	3850	cls_2	0.0052	36	48.0416	0.692308
F:\landscape\forest_land	5642	cls_2	0.0056	36	50	0.642857
F:\landscape\forest_land	2519	cls_2	0.0228	72	50	0.315789
F:\landscape\forest_land	10936	cls_3	0.0972	144	50.1199	0.148148
F:\landscape\forest_land	6278	cls_2	0.1552	180	57.7235	0.115979
F:\landscape\forest_land	2711	cls_4	0.0052	36	58	0.692308
F:\landscape\forest_land	10032	cls_3	0.0052	36	58.1378	0.692308
F:\landscape\forest_land	4182	cls_3	0.006	36	59.4643	0.6
F:\landscape\forest_land	7912	cls_3	0.0052	36	60.1332	0.692308
F:\landscape\forest_land	10486	cls_3	0.0252	72	62.1289	0.285714
F:\landscape\forest_land	3591	cls_3	0.006	36	62.2896	0.6
F:\landscape\forest_land	10507	cls_2	0.0056	36	65.9697	0.642857
F:\landscape\forest_land	7829	cls_3	0.0056	36	73.5935	0.642857
F:\landscape\forest_land	3343	cls_3	0.0052	36	75.3923	0.692308
F:\landscape\forest_land	1107	cls_1	0.0056	36	78.1025	0.642857
F:\landscape\forest_land	7050	cls_3	0.006	36	78.8162	0.6
F:\landscape\forest_land	7830	cls_2	0.006	36	87.7268	0.6
F:\landscape\forest_land	4138	cls_3	0.0052	36	88.7694	0.692308
F:\landscape\forest_land	5561	cls_3	0.0052	36	92.1303	0.692308
F:\landscape\forest_land	3483	cls_2	0.0052	36	94.0213	0.692308
F:\landscape\forest_land	3656	cls_3	0.0064	36	108.019	0.5625
F:\landscape\forest_land	9260	cls_1	0.0064	36	110.309	0.5625
F:\landscape\forest_land	8342	cls_3	0.0064	36	110.725	0.5625
F:\landscape\forest_land	4382	cls_3	0.0052	36	122.931	0.692308
F:\landscape\forest_land	4027	cls_3	0.0064	36	129.553	0.5625
F:\landscape\forest_land	4139	cls_3	0.0052	36	143.136	0.692308
F:\landscape\forest_land	7448	cls_3	0.0052	36	176.556	0.692308
F:\landscape\forest_land	3018	cls_2	0.006	36	177.201	0.6
F:\landscape\forest_land	6024	cls_3	0.0052	36	180.278	0.692308
F:\landscape\forest_land	9619	cls_3	0.2272	216	197.768	0.0950704
F:\landscape\forest_land	8166	cls_3	0.0056	36	228.316	0.642857
F:\landscape\forest_land	2899	cls_4	0.0052	36	380.063	0.692308
F:\landscape\forest_land	2644	cls_3	0.0052	36	515.632	0.692308
F:\landscape\forest_land	3334	cls_3	0.0052	36	618.521	0.692308
F:\landscape\forest_land	9995	cls_3	0.0488	104	4.4721	0.213115
F:\landscape\forest_land	506	cls_4	0.4668	312	6	0.066838
F:\landscape\forest_land	2297	cls_3	0.0496	104	24	0.209677
F:\landscape\forest_land	2565	cls_3	0.0516	104	47.2017	0.20155
F:\landscape\forest_land	6112	cls_3	0.0512	104	64.7765	0.203125
F:\landscape\forest_land	10044	cls_1	0.0212	68	4	0.320755
F:\landscape\forest_land	7963	cls_3	0.0212	68	7.2111	0.320755
F:\landscape\forest_land	10752	cls_2	0.0216	68	10.198	0.314815
F:\landscape\forest_land	4944	cls_1	0.0204	68	10.7703	0.333333
F:\landscape\forest_land	4990	cls_3	0.0216	68	16.9706	0.314815
F:\landscape\forest_land	402	cls_2	0.0212	68	17.8885	0.320755
F:\landscape\forest_land	3140	cls_3	0.0868	136	24.4131	0.156682
F:\landscape\forest_land	6048	cls_3	0.0208	68	26.0768	0.326923
F:\landscape\forest_land	7047	cls_3	0.02	68	32.5576	0.34
F:\landscape\forest_land	5369	cls_2	0.0208	68	40	0.326923
F:\landscape\forest_land	5030	cls_3	0.0204	68	40.4475	0.333333
F:\landscape\forest_land	10197	cls_3	0.0204	68	41.2311	0.333333
F:\landscape\forest_land	8373	cls_3	0.0204	68	50	0.333333
F:\landscape\forest_land	2919	cls_3	0.02	68	84.8999	0.34
F:\landscape\forest_land	11786	cls_3	0.0892	136	96.3328	0.152466
F:\landscape\forest_land	9208	cls_3	0.4388	304	8.9443	0.0692799
F:\landscape\forest_land	9523	cls_3	0.048	100	8.9443	0.208333
F:\landscape\forest_land	2535	cls_3	0.046	100	10	0.217391
F:\landscape\forest_land	409	cls_3	0.1876	200	14	0.10661
F:\landscape\forest_land	3665	cls_3	0.0444	100	42.0476	0.225225
F:\landscape\forest_land	1425	cls_2	0.084	132	10	0.157143
F:\landscape\forest_land	11632	cls_2	0.0804	132	36	0.164179
F:\landscape\forest_land	3396	cls_2	0.1288	164	12	0.127329
F:\landscape\forest_land	29	cls_2	2.3824	708	27.7849	0.0297179
F:\landscape\forest_land	806	cls_2	0.004	32	4	0.8
F:\landscape\forest_land	8703	cls_3	0.0048	32	4	0.666667
F:\landscape\forest_land	2324	cls_3	0.0044	32	4	0.727273
F:\landscape\forest_land	5289	cls_2	0.004	32	4	0.8
F:\landscape\forest_land	8310	cls_3	0.0044	32	4	0.727273
F:\landscape\forest_land	9747	cls_4	0.004	32	4	0.8
F:\landscape\forest_land	2978	cls_2	0.0044	32	4	0.727273
F:\landscape\forest_land	10979	cls_3	0.0048	32	4	0.666667
F:\landscape\forest_land	425	cls_2	0.0196	64	4	0.326531
F:\landscape\forest_land	1325	cls_1	0.004	32	4.4721	0.8
F:\landscape\forest_land	11130	cls_2	0.004	32	4.4721	0.8
F:\landscape\forest_land	7778	cls_3	0.0044	32	4.4721	0.727273
F:\landscape\forest_land	5023	cls_2	0.004	32	4.4721	0.8
F:\landscape\forest_land	3336	cls_2	0.004	32	4.4721	0.8
F:\landscape\forest_land	6351	cls_3	0.004	32	4.4721	0.8
F:\landscape\forest_land	5502	cls_3	0.004	32	4.4721	0.8
F:\landscape\forest_land	3256	cls_2	0.0048	32	4.4721	0.666667
F:\landscape\forest_land	2513	cls_3	0.0176	64	4.4721	0.363636
F:\landscape\forest_land	7392	cls_3	0.0196	64	4.4721	0.326531
F:\landscape\forest_land	1951	cls_4	0.004	32	5.6569	0.8
F:\landscape\forest_land	3682	cls_3	0.0044	32	5.6569	0.727273
F:\landscape\forest_land	2706	cls_4	0.0044	32	5.6569	0.727273
F:\landscape\forest_land	5613	cls_2	0.0044	32	5.6569	0.727273
F:\landscape\forest_land	6007	cls_3	0.0044	32	5.6569	0.727273
F:\landscape\forest_land	8401	cls_3	0.004	32	5.6569	0.8
F:\landscape\forest_land	4107	cls_3	0.0044	32	5.6569	0.727273
F:\landscape\forest_land	9721	cls_3	0.0044	32	5.6569	0.727273
F:\landscape\forest_land	7403	cls_2	0.0048	32	5.6569	0.666667
F:\landscape\forest_land	7295	cls_3	0.0172	64	5.6569	0.372093
F:\landscape\forest_land	8247	cls_3	0.004	32	6	0.8
F:\landscape\forest_land	5847	cls_2	0.004	32	6	0.8
F:\landscape\forest_land	5853	cls_2	0.004	32	6	0.8
F:\landscape\forest_land	6192	cls_3	0.0044	32	6	0.727273
F:\landscape\forest_land	6713	cls_3	0.004	32	6	0.8
F:\landscape\forest_land	7678	cls_3	0.004	32	6	0.8
F:\landscape\forest_land	849	cls_2	0.0048	32	6	0.666667
F:\landscape\forest_land	9835	cls_3	0.0044	32	6	0.727273
F:\landscape\forest_land	5009	cls_2	0.0044	32	6	0.727273
F:\landscape\forest_land	8897	cls_3	0.004	32	6.3246	0.8
F:\landscape\forest_land	575	cls_2	0.0048	32	6.3246	0.666667
F:\landscape\forest_land	3976	cls_3	0.0044	32	6.3246	0.727273
F:\landscape\forest_land	8734	cls_4	0.0044	32	6.3246	0.727273
F:\landscape\forest_land	4133	cls_3	0.004	32	6.3246	0.8
F:\landscape\forest_land	5952	cls_2	0.0044	32	6.3246	0.727273
F:\landscape\forest_land	8637	cls_3	0.0176	64	6.3246	0.363636
F:\landscape\forest_land	7915	cls_2	0.0192	64	6.3246	0.333333
F:\landscape\forest_land	4856	cls_4	0.004	32	7.2111	0.8
F:\landscape\forest_land	5431	cls_3	0.0044	32	7.2111	0.727273
F:\landscape\forest_land	3488	cls_3	0.0044	32	7.2111	0.727273
F:\landscape\forest_land	9632	cls_3	0.0048	32	7.2111	0.666667
F:\landscape\forest_land	3477	cls_2	0.0044	32	7.2111	0.727273
F:\landscape\forest_land	464	cls_1	0.0048	32	7.2111	0.666667
F:\landscape\forest_land	4706	cls_3	0.0172	64	7.2111	0.372093
F:\landscape\forest_land	6991	cls_3	0.0044	32	8	0.727273
F:\landscape\forest_land	5728	cls_2	0.0048	32	8	0.666667
F:\landscape\forest_land	3108	cls_3	0.0044	32	8	0.727273
F:\landscape\forest_land	7989	cls_2	0.0172	64	8	0.372093
F:\landscape\forest_land	9115	cls_3	0.0172	64	8.2462	0.372093
F:\landscape\forest_land	2730	cls_4	0.0188	64	8.2462	0.340426
F:\landscape\forest_land	5576	cls_2	0.0044	32	8.4853	0.727273
F:\landscape\forest_land	6981	cls_3	0.0048	32	8.9443	0.666667
F:\landscape\forest_land	4209	cls_3	0.004	32	10	0.8
F:\landscape\forest_land	1030	cls_1	0.0048	32	10	0.666667
F:\landscape\forest_land	4137	cls_2	0.0048	32	10	0.666667
F:\landscape\forest_land	11241	cls_3	0.0184	64	10	0.347826
F:\landscape\forest_land	9412	cls_3	0.0192	64	10	0.333333
F:\landscape\forest_land	2805	cls_4	0.004	32	10.7703	0.8
F:\landscape\forest_land	10441	cls_3	0.0196	64	10.7703	0.326531
F:\landscape\forest_land	9030	cls_4	0.0188	64	10.7703	0.340426
F:\landscape\forest_land	459	cls_2	0.0172	64	10.7703	0.372093
F:\landscape\forest_land	10444	cls_3	0.0436	96	10.7703	0.220183
F:\landscape\forest_land	4696	cls_3	0.004	32	11.3137	0.8
F:\landscape\forest_land	9661	cls_3	0.0044	32	11.3137	0.727273
F:\landscape\forest_land	5831	cls_3	0.0044	32	11.6619	0.727273
F:\landscape\forest_land	5924	cls_3	0.0044	32	12	0.727273
F:\landscape\forest_land	5987	cls_3	0.0048	32	12	0.666667
F:\landscape\forest_land	4789	cls_2	0.018	64	12	0.355556
F:\landscape\forest_land	5423	cls_3	0.0048	32	12.6491	0.666667
F:\landscape\forest_land	2678	cls_4	0.004	32	12.8062	0.8
F:\landscape\forest_land	3738	cls_3	0.0048	32	12.8062	0.666667
F:\landscape\forest_land	8973	cls_3	0.004	32	12.8062	0.8
F:\landscape\forest_land	5387	cls_2	0.004	32	14	0.8
F:\landscape\forest_land	7942	cls_2	0.0044	32	14	0.727273
F:\landscape\forest_land	6021	cls_3	0.0176	64	14	0.363636
F:\landscape\forest_land	11505	cls_2	0.0184	64	14.1421	0.347826
F:\landscape\forest_land	8753	cls_3	0.0048	32	14.4222	0.666667
F:\landscape\forest_land	7081	cls_3	0.0044	32	15.2315	0.727273
F:\landscape\forest_land	9402	cls_3	0.0172	64	15.2315	0.372093
F:\landscape\forest_land	4942	cls_3	0.0044	32	16.1245	0.727273
F:\landscape\forest_land	7750	cls_3	0.0044	32	18	0.727273
F:\landscape\forest_land	6393	cls_3	0.004	32	20.3961	0.8
F:\landscape\forest_land	11234	cls_2	0.0188	64	20.5913	0.340426
F:\landscape\forest_land	4878	cls_1	0.078	128	20.8806	0.164103
F:\landscape\forest_land	6270	cls_1	0.0176	64	21.2603	0.363636
F:\landscape\forest_land	6205	cls_3	0.004	32	21.5407	0.8
F:\landscape\forest_land	2088	cls_2	0.004	32	21.6333	0.8
F:\landscape\forest_land	2733	cls_2	0.0044	32	22.0907	0.727273
F:\landscape\forest_land	6126	cls_3	0.004	32	22.3607	0.8
F:\landscape\forest_land	3014	cls_3	0.042	96	22.3607	0.228571
F:\landscape\forest_land	5488	cls_3	0.0044	32	24	0.727273
F:\landscape\forest_land	6534	cls_2	0.0044	32	24	0.727273
F:\landscape\forest_land	11718	cls_1	0.0044	32	24	0.727273
F:\landscape\forest_land	323	cls_2	0.0044	32	25.6125	0.727273
F:\landscape\forest_land	10342	cls_3	0.0044	32	26	0.727273
F:\landscape\forest_land	4780	cls_3	0.0048	32	26	0.666667
F:\landscape\forest_land	8241	cls_3	0.0048	32	26	0.666667
F:\landscape\forest_land	5718	cls_2	0.0044	32	26.3059	0.727273
F:\landscape\forest_land	6744	cls_3	0.0044	32	28.4253	0.727273
F:\landscape\forest_land	5659	cls_3	0.004	32	29.1204	0.8
F:\landscape\forest_land	7784	cls_3	0.0044	32	30.4631	0.727273
F:\landscape\forest_land	3592	cls_3	0.0048	32	30.5941	0.666667
F:\landscape\forest_land	4046	cls_3	0.0196	64	35.4401	0.326531
F:\landscape\forest_land	4860	cls_2	0.004	32	36.7151	0.8
F:\landscape\forest_land	4116	cls_2	0.004	32	36.7696	0.8
F:\landscape\forest_land	9468	cls_3	0.0044	32	40.4475	0.727273
F:\landscape\forest_land	5323	cls_2	0.0408	96	40.7922	0.235294
F:\landscape\forest_land	6655	cls_3	0.0744	128	42.19	0.172043
F:\landscape\forest_land	8905	cls_3	0.0048	32	42.4264	0.666667
F:\landscape\forest_land	9143	cls_3	0.0044	32	43.8634	0.727273
F:\landscape\forest_land	7496	cls_2	0.0048	32	47.4131	0.666667
F:\landscape\forest_land	5865	cls_3	0.0044	32	49.3964	0.727273
F:\landscape\forest_land	2892	cls_2	0.004	32	50.5964	0.8
F:\landscape\forest_land	10202	cls_3	0.0048	32	52.4976	0.666667
F:\landscape\forest_land	9814	cls_3	0.0044	32	53.8516	0.727273
F:\landscape\forest_land	9360	cls_2	0.004	32	56	0.8
F:\landscape\forest_land	10639	cls_3	0.0048	32	56.8507	0.666667
F:\landscape\forest_land	3410	cls_2	0.004	32	56.921	0.8
F:\landscape\forest_land	5737	cls_2	0.0756	128	62	0.169312
F:\landscape\forest_land	7213	cls_3	0.0436	96	64.0312	0.220183
F:\landscape\forest_land	166	cls_3	0.0048	32	64.7765	0.666667
F:\landscape\forest_land	3630	cls_3	0.0188	64	82	0.340426
F:\landscape\forest_land	10365	cls_3	0.004	32	84.3801	0.8
F:\landscape\forest_land	10540	cls_3	0.0192	64	90	0.333333
F:\landscape\forest_land	6601	cls_2	0.0188	64	100.24	0.340426
F:\landscape\forest_land	3839	cls_3	0.0044	32	104.403	0.727273
F:\landscape\forest_land	7728	cls_3	0.0044	32	120.266	0.727273
F:\landscape\forest_land	4154	cls_3	0.0048	32	136.059	0.666667
F:\landscape\forest_land	6400	cls_3	0.004	32	153.101	0.8
F:\landscape\forest_land	3798	cls_3	0.0044	32	161.059	0.727273
F:\landscape\forest_land	8852	cls_3	0.004	32	163.768	0.8
F:\landscape\forest_land	10455	cls_3	0.0172	64	167.201	0.372093
F:\landscape\forest_land	10771	cls_3	0.0048	32	270.118	0.666667
F:\landscape\forest_land	844	cls_2	0.81	412	41.0366	0.0508642
F:\landscape\forest_land	1903	cls_1	1.1888	504	32.9848	0.0423957
F:\landscape\forest_land	4522	cls_3	0.2228	220	56.4624	0.0987433
F:\landscape\forest_land	3412	cls_2	0.1132	156	20	0.137809
F:\landscape\forest_land	1843	cls_2	0.7604	404	16	0.0531299
F:\landscape\forest_land	9273	cls_3	0.07	124	8	0.177143
F:\landscape\forest_land	9300	cls_3	0.2188	216	64.405	0.0987203
F:\landscape\forest_land	10878	cls_4	1.7696	616	34	0.0348101
F:\landscape\forest_land	5826	cls_3	0.0364	92	4.4721	0.252747
F:\landscape\forest_land	9905	cls_3	0.0384	92	6.3246	0.239583
F:\landscape\forest_land	9290	cls_3	0.1544	184	10	0.119171
F:\landscape\forest_land	3604	cls_1	0.04	92	43.8634	0.23
F:\landscape\forest_land	10509	cls_3	0.04	92	47.5395	0.23
F:\landscape\forest_land	1163	cls_1	0.0384	92	64.0312	0.239583
F:\landscape\forest_land	4620	cls_3	0.5228	336	12.6491	0.0642693
F:\landscape\forest_land	9466	cls_3	0.1064	152	6	0.142857
F:\landscape\forest_land	9444	cls_1	1.8968	636	8	0.0335302
F:\landscape\forest_land	9510	cls_3	0.0148	60	4	0.405405
F:\landscape\forest_land	8509	cls_3	0.0148	60	4	0.405405
F:\landscape\forest_land	9023	cls_3	0.0148	60	6.3246	0.405405
F:\landscape\forest_land	4885	cls_4	0.0148	60	7.2111	0.405405
F:\landscape\forest_land	1754	cls_4	0.0152	60	7.2111	0.394737
F:\landscape\forest_land	3031	cls_3	0.0168	60	7.2111	0.357143
F:\landscape\forest_land	10713	cls_3	0.0156	60	8.2462	0.384615
F:\landscape\forest_land	3878	cls_2	0.0168	60	8.4853	0.357143
F:\landscape\forest_land	7759	cls_3	0.0152	60	10	0.394737
F:\landscape\forest_land	8322	cls_3	0.0148	60	10	0.405405
F:\landscape\forest_land	2279	cls_3	0.0168	60	10	0.357143
F:\landscape\forest_land	8887	cls_3	0.0152	60	11.6619	0.394737
F:\landscape\forest_land	6929	cls_2	0.0152	60	12.6491	0.394737
F:\landscape\forest_land	4793	cls_3	0.0148	60	12.8062	0.405405
F:\landscape\forest_land	8226	cls_3	0.0152	60	14	0.394737
F:\landscape\forest_land	7629	cls_3	0.016	60	14.5602	0.375
F:\landscape\forest_land	4073	cls_2	0.016	60	16.4924	0.375
F:\landscape\forest_land	10378	cls_3	0.146	180	20	0.123288
F:\landscape\forest_land	6074	cls_2	0.0156	60	24.4131	0.384615
F:\landscape\forest_land	4519	cls_3	0.016	60	24.7386	0.375
F:\landscape\forest_land	9171	cls_1	0.0148	60	25.4558	0.405405
F:\landscape\forest_land	3228	cls_4	0.0152	60	26.0768	0.394737
F:\landscape\forest_land	7610	cls_3	0.0168	60	26.8328	0.357143
F:\landscape\forest_land	9406	cls_4	0.0148	60	34.9285	0.405405
F:\landscape\forest_land	2568	cls_2	0.0152	60	34.9285	0.394737
F:\landscape\forest_land	11653	cls_2	0.0676	120	37.9473	0.177515
F:\landscape\forest_land	6678	cls_3	0.016	60	38	0.375
F:\landscape\forest_land	5056	cls_3	0.0152	60	46.8188	0.394737
F:\landscape\forest_land	7981	cls_3	0.0672	120	58.8218	0.178571
F:\landscape\forest_land	7390	cls_3	0.0148	60	62.1289	0.405405
F:\landscape\forest_land	10464	cls_1	0.1488	180	63.2456	0.120968
F:\landscape\forest_land	9677	cls_3	0.0156	60	86.8332	0.384615
F:\landscape\forest_land	11729	cls_3	0.0168	60	117.388	0.357143
F:\landscape\forest_land	3379	cls_2	0.0148	60	176	0.405405
F:\landscape\forest_land	1526	cls_1	0.0152	60	209.619	0.394737
F:\landscape\forest_land	1733	cls_2	0.694	388	4	0.0559078
F:\landscape\forest_land	9202	cls_3	0.0976	148	24	0.151639
F:\landscape\forest_land	9440	cls_1	2.118	676	10.7703	0.0319169
F:\landscape\forest_land	4334	cls_3	0.0336	88	4	0.261905
F:\landscape\forest_land	5485	cls_3	0.0356	88	6	0.247191
F:\landscape\forest_land	11836	cls_1	0.034	88	14	0.258824
F:\landscape\forest_land	11414	cls_3	0.034	88	17.2047	0.258824
F:\landscape\forest_land	11622	cls_2	0.1388	176	20	0.126801
F:\landscape\forest_land	8690	cls_2	0.0328	88	26.3059	0.268293
F:\landscape\forest_land	10130	cls_3	0.0356	88	30.0666	0.247191
F:\landscape\forest_land	3660	cls_3	0.0336	88	56.8507	0.261905
F:\landscape\forest_land	5159	cls_3	0.1428	176	131.59	0.123249
F:\landscape\forest_land	7132	cls_3	0.0332	88	137.768	0.26506
F:\landscape\forest_land	7655	cls_3	0.034	88	172.047	0.258824
F:\landscape\forest_land	1291	cls_3	0.0328	88	285.671	0.268293
F:\landscape\forest_land	2876	cls_2	0.1936	204	8	0.105372
F:\landscape\forest_land	10273	cls_3	0.092	144	16.1245	0.156522
F:\landscape\forest_land	2016	cls_3	0.0928	144	22.8035	0.155172
F:\landscape\forest_land	7429	cls_3	0.0908	144	31.0483	0.15859
F:\landscape\forest_land	1989	cls_3	0.094	144	54.4059	0.153191
F:\landscape\forest_land	4479	cls_4	0.0912	144	65.1153	0.157895
F:\landscape\forest_land	7583	cls_3	0.0948	144	72	0.151899
F:\landscape\forest_land	11350	cls_3	0.0032	28	4	0.875
F:\landscape\forest_land	4767	cls_2	0.0036	28	4	0.777778
F:\landscape\forest_land	1948	cls_3	0.0036	28	4	0.777778
F:\landscape\forest_land	3651	cls_3	0.0036	28	4	0.777778
F:\landscape\forest_land	5727	cls_1	0.0036	28	4	0.777778
F:\landscape\forest_land	7651	cls_2	0.0032	28	4	0.875
F:\landscape\forest_land	5311	cls_3	0.0036	28	4	0.777778
F:\landscape\forest_land	2380	cls_3	0.0036	28	4	0.777778
F:\landscape\forest_land	10403	cls_3	0.0036	28	4	0.777778
F:\landscape\forest_land	7466	cls_3	0.0036	28	4	0.777778
F:\landscape\forest_land	2994	cls_3	0.014	56	4	0.4
F:\landscape\forest_land	1293	cls_1	0.0124	56	4	0.451613
F:\landscape\forest_land	5240	cls_3	0.0132	56	4	0.424242
F:\landscape\forest_land	4342	cls_3	0.0136	56	4	0.411765
F:\landscape\forest_land	7790	cls_2	0.0036	28	4.4721	0.777778
F:\landscape\forest_land	9279	cls_3	0.0144	56	4.4721	0.388889
F:\landscape\forest_land	3930	cls_2	0.0132	56	4.4721	0.424242
F:\landscape\forest_land	9591	cls_3	0.0032	28	5.6569	0.875
F:\landscape\forest_land	2728	cls_4	0.0036	28	5.6569	0.777778
F:\landscape\forest_land	4060	cls_2	0.0036	28	5.6569	0.777778
F:\landscape\forest_land	6685	cls_2	0.0036	28	6	0.777778
F:\landscape\forest_land	6168	cls_3	0.0036	28	6	0.777778
F:\landscape\forest_land	10842	cls_2	0.0128	56	6	0.4375
F:\landscape\forest_land	10068	cls_3	0.0036	28	6.3246	0.777778
F:\landscape\forest_land	8601	cls_4	0.0032	28	6.3246	0.875
F:\landscape\forest_land	8656	cls_3	0.0036	28	6.3246	0.777778
F:\landscape\forest_land	8661	cls_3	0.0036	28	6.3246	0.777778
F:\landscape\forest_land	10701	cls_3	0.0136	56	6.3246	0.411765
F:\landscape\forest_land	4378	cls_3	0.0036	28	7.2111	0.777778
F:\landscape\forest_land	186	cls_3	0.0032	28	7.2111	0.875
F:\landscape\forest_land	9243	cls_2	0.0036	28	7.2111	0.777778
F:\landscape\forest_land	10180	cls_3	0.0036	28	7.2111	0.777778
F:\landscape\forest_land	7175	cls_2	0.014	56	7.2111	0.4
F:\landscape\forest_land	5784	cls_2	0.0292	84	7.2111	0.287671
F:\landscape\forest_land	1883	cls_4	0.0036	28	8	0.777778
F:\landscape\forest_land	4437	cls_2	0.0036	28	8	0.777778
F:\landscape\forest_land	2760	cls_4	0.0036	28	8	0.777778
F:\landscape\forest_land	11232	cls_2	0.0032	28	8	0.875
F:\landscape\forest_land	4454	cls_2	0.0036	28	8	0.777778
F:\landscape\forest_land	9746	cls_3	0.0036	28	8	0.777778
F:\landscape\forest_land	9445	cls_3	0.0132	56	8	0.424242
F:\landscape\forest_land	11711	cls_1	0.0036	28	8.2462	0.777778
F:\landscape\forest_land	6623	cls_2	0.0036	28	8.4853	0.777778
F:\landscape\forest_land	9884	cls_3	0.0036	28	8.4853	0.777778
F:\landscape\forest_land	3802	cls_2	0.0036	28	8.4853	0.777778
F:\landscape\forest_land	6632	cls_2	0.0124	56	8.4853	0.451613
F:\landscape\forest_land	7030	cls_3	0.0036	28	8.9443	0.777778
F:\landscape\forest_land	8449	cls_3	0.0036	28	10	0.777778
F:\landscape\forest_land	9962	cls_3	0.0136	56	10	0.411765
F:\landscape\forest_land	6423	cls_3	0.0136	56	10	0.411765
F:\landscape\forest_land	6949	cls_3	0.0132	56	10	0.424242
F:\landscape\forest_land	8266	cls_2	0.0132	56	10	0.424242
F:\landscape\forest_land	1653	cls_2	0.0132	56	10	0.424242
F:\landscape\forest_land	3118	cls_2	0.0312	84	10	0.269231
F:\landscape\forest_land	10887	cls_2	0.0032	28	10.198	0.875
F:\landscape\forest_land	9346	cls_4	0.0036	28	10.198	0.777778
F:\landscape\forest_land	9556	cls_1	0.0036	28	10.7703	0.777778
F:\landscape\forest_land	7674	cls_3	0.0036	28	10.7703	0.777778
F:\landscape\forest_land	10954	cls_2	0.0036	28	10.7703	0.777778
F:\landscape\forest_land	8041	cls_3	0.0032	28	12	0.875
F:\landscape\forest_land	6101	cls_3	0.0124	56	12	0.451613
F:\landscape\forest_land	2057	cls_3	0.0036	28	12.6491	0.777778
F:\landscape\forest_land	8380	cls_2	0.0036	28	14.1421	0.777778
F:\landscape\forest_land	8911	cls_3	0.0128	56	14.1421	0.4375
F:\landscape\forest_land	341	cls_2	0.0032	28	16.1245	0.875
F:\landscape\forest_land	4617	cls_3	0.0324	84	16.1245	0.259259
F:\landscape\forest_land	7592	cls_3	0.0548	112	17.088	0.20438
F:\landscape\forest_land	8517	cls_2	0.0036	28	18	0.777778
F:\landscape\forest_land	3487	cls_3	0.0128	56	18	0.4375
F:\landscape\forest_land	5839	cls_2	0.0036	28	18.1108	0.777778
F:\landscape\forest_land	5588	cls_2	0.0132	56	18.4391	0.424242
F:\landscape\forest_land	10371	cls_3	0.1272	168	20	0.132075
F:\landscape\forest_land	7826	cls_3	0.0032	28	20.5913	0.875
F:\landscape\forest_land	8859	cls_3	0.0032	28	20.5913	0.875
F:\landscape\forest_land	7225	cls_3	0.0132	56	20.5913	0.424242
F:\landscape\forest_land	5864	cls_3	0.0036	28	21.5407	0.777778
F:\landscape\forest_land	8128	cls_3	0.0032	28	22	0.875
F:\landscape\forest_land	8623	cls_3	0.0036	28	22.3607	0.777778
F:\landscape\forest_land	11830	cls_1	0.014	56	24	0.4
F:\landscape\forest_land	6721	cls_2	0.0132	56	24.0832	0.424242
F:\landscape\forest_land	11250	cls_3	0.0132	56	24.1661	0.424242
F:\landscape\forest_land	3287	cls_3	0.0144	56	26	0.388889
F:\landscape\forest_land	8800	cls_3	0.0032	28	27.7849	0.875
F:\landscape\forest_land	3585	cls_3	0.0036	28	28	0.777778
F:\landscape\forest_land	9107	cls_3	0.0128	56	28	0.4375
F:\landscape\forest_land	6245	cls_3	0.0036	28	28.4253	0.777778
F:\landscape\forest_land	1215	cls_1	0.0032	28	30	0.875
F:\landscape\forest_land	9828	cls_3	0.0036	28	34	0.777778
F:\landscape\forest_land	10011	cls_1	0.0312	84	38.4187	0.269231
F:\landscape\forest_land	10296	cls_3	0.0036	28	39.6989	0.777778
F:\landscape\forest_land	7500	cls_3	0.0128	56	40	0.4375
F:\landscape\forest_land	6494	cls_3	0.0124	56	41.1825	0.451613
F:\landscape\forest_land	2003	cls_3	0.0144	56	42.19	0.388889
F:\landscape\forest_land	2668	cls_3	0.0132	56	42.9418	0.424242
F:\landscape\forest_land	9078	cls_3	0.014	56	46.0435	0.4
F:\landscape\forest_land	8812	cls_3	0.0036	28	46.8615	0.777778
F:\landscape\forest_land	6804	cls_3	0.0128	56	53.8145	0.4375
F:\landscape\forest_land	73	cls_1	0.0036	28	55.7853	0.777778
F:\landscape\forest_land	8906	cls_3	0.0124	56	59.4643	0.451613
F:\landscape\forest_land	8496	cls_3	0.0124	56	60	0.451613
F:\landscape\forest_land	5105	cls_2	0.0036	28	60.0333	0.777778
F:\landscape\forest_land	8940	cls_3	0.0036	28	63.2456	0.777778
F:\landscape\forest_land	209	cls_1	0.0032	28	67.6757	0.875
F:\landscape\forest_land	7700	cls_2	0.0124	56	68.9638	0.451613
F:\landscape\forest_land	10118	cls_3	0.0036	28	72.111	0.777778
F:\landscape\forest_land	10319	cls_3	0.0032	28	72.8011	0.875
F:\landscape\forest_land	10661	cls_3	0.0036	28	75.71	0.777778
F:\landscape\forest_land	261	cls_1	0.0536	112	81.5843	0.208955
F:\landscape\forest_land	3636	cls_3	0.0132	56	82	0.424242
F:\landscape\forest_land	3578	cls_3	0.0036	28	90.4434	0.777778
F:\landscape\forest_land	833	cls_3	0.0304	84	91.3017	0.276316
F:\landscape\forest_land	3473	cls_2	0.0128	56	96.0417	0.4375
F:\landscape\forest_land	4147	cls_1	0.0124	56	99.2975	0.451613
F:\landscape\forest_land	4595	cls_3	0.0036	28	148.661	0.777778
F:\landscape\forest_land	322	cls_3	0.0036	28	156.115	0.777778
F:\landscape\forest_land	6546	cls_3	0.0856	140	204.284	0.163551
F:\landscape\forest_land	10532	cls_3	0.0032	28	300.007	0.875
F:\landscape\forest_land	11511	cls_1	0.0032	28	394.614	0.875
F:\landscape\forest_land	1786	cls_3	2.568	752	5.6569	0.0292835
F:\landscape\forest_land	11739	cls_3	0.1192	164	92.0217	0.137584
F:\landscape\forest_land	10291	cls_2	0.0816	136	34.9285	0.166667
F:\landscape\forest_land	8443	cls_3	0.0504	108	12	0.214286
F:\landscape\forest_land	5268	cls_2	0.0504	108	15.2315	0.214286
F:\landscape\forest_land	5368	cls_3	0.0492	108	18	0.219512
F:\landscape\forest_land	2311	cls_1	0.0488	108	18.868	0.221311
F:\landscape\forest_land	8617	cls_3	0.0508	108	24.7386	0.212598
F:\landscape\forest_land	6281	cls_3	0.0512	108	42.4264	0.210938
F:\landscape\forest_land	9441	cls_3	0.0488	108	111.086	0.221311
F:\landscape\forest_land	3434	cls_2	0.1596	188	17.8885	0.117794
F:\landscape\forest_land	5	cls_1	0.1588	188	152.591	0.118388
F:\landscape\forest_land	3528	cls_1	0.0268	80	5.6569	0.298507
F:\landscape\forest_land	2341	cls_3	0.0268	80	6	0.298507
F:\landscape\forest_land	7185	cls_3	0.0284	80	8.4853	0.28169
F:\landscape\forest_land	5993	cls_3	0.256	240	10	0.09375
F:\landscape\forest_land	10019	cls_3	0.1096	160	12	0.145985
F:\landscape\forest_land	5487	cls_2	0.0268	80	20.0998	0.298507
F:\landscape\forest_land	5486	cls_2	0.0264	80	20.0998	0.30303
F:\landscape\forest_land	2298	cls_3	0.028	80	24	0.285714
F:\landscape\forest_land	7019	cls_3	0.1124	160	140.684	0.142349
F:\landscape\forest_land	290	cls_4	0.918	452	2037.89	0.0492375
F:\landscape\forest_land	9907	cls_3	0.2004	212	23.3238	0.105788
F:\landscape\forest_land	3137	cls_3	0.0756	132	6	0.174603
F:\landscape\forest_land	5215	cls_3	0.0732	132	8	0.180328
F:\landscape\forest_land	6305	cls_3	0.0776	132	10	0.170103
F:\landscape\forest_land	8566	cls_3	0.078	132	12.1655	0.169231
F:\landscape\forest_land	5858	cls_3	0.076	132	17.8885	0.173684
F:\landscape\forest_land	482	cls_4	0.1448	184	4	0.127072
F:\landscape\forest_land	7725	cls_3	0.15	184	101.213	0.122667
F:\landscape\forest_land	9755	cls_3	0.246	236	110.725	0.095935
F:\landscape\forest_land	11184	cls_3	0.2468	236	214.037	0.095624
F:\landscape\forest_land	6059	cls_3	0.3648	288	8	0.0789474
F:\landscape\forest_land	397	cls_2	0.0112	52	4	0.464286
F:\landscape\forest_land	11478	cls_3	0.0104	52	4	0.5
F:\landscape\forest_land	9028	cls_4	0.0108	52	4	0.481481
F:\landscape\forest_land	3888	cls_3	0.012	52	4	0.433333
F:\landscape\forest_land	3674	cls_2	0.0112	52	4	0.464286
F:\landscape\forest_land	5895	cls_3	0.0112	52	4.4721	0.464286
F:\landscape\forest_land	10499	cls_1	0.0116	52	4.4721	0.448276
F:\landscape\forest_land	8679	cls_3	0.0108	52	5.6569	0.481481
F:\landscape\forest_land	9698	cls_3	0.012	52	6	0.433333
F:\landscape\forest_land	6085	cls_2	0.0108	52	6	0.481481
F:\landscape\forest_land	4550	cls_2	0.012	52	6	0.433333
F:\landscape\forest_land	10817	cls_2	0.0444	104	6	0.234234
F:\landscape\forest_land	2223	cls_3	0.0456	104	6.3246	0.22807
F:\landscape\forest_land	2606	cls_2	0.0108	52	7.2111	0.481481
F:\landscape\forest_land	4792	cls_3	0.0108	52	7.2111	0.481481
F:\landscape\forest_land	6978	cls_3	0.0112	52	7.2111	0.464286
F:\landscape\forest_land	564	cls_1	0.012	52	8	0.433333
F:\landscape\forest_land	4136	cls_2	0.0112	52	8	0.464286
F:\landscape\forest_land	11035	cls_3	0.0108	52	8	0.481481
F:\landscape\forest_land	3508	cls_2	0.0108	52	8.2462	0.481481
F:\landscape\forest_land	7173	cls_3	0.0116	52	8.4853	0.448276
F:\landscape\forest_land	2949	cls_2	0.0104	52	8.9443	0.5
F:\landscape\forest_land	2129	cls_2	0.0112	52	10	0.464286
F:\landscape\forest_land	9408	cls_3	0.0112	52	10	0.464286
F:\landscape\forest_land	9781	cls_3	0.0116	52	10	0.448276
F:\landscape\forest_land	1345	cls_1	0.0112	52	10	0.464286
F:\landscape\forest_land	6427	cls_2	0.0104	52	10.7703	0.5
F:\landscape\forest_land	2417	cls_3	0.0116	52	11.3137	0.448276
F:\landscape\forest_land	8875	cls_3	0.0116	52	11.6619	0.448276
F:\landscape\forest_land	2764	cls_4	0.0104	52	11.6619	0.5
F:\landscape\forest_land	5126	cls_3	0.0104	52	12	0.5
F:\landscape\forest_land	7887	cls_3	0.0104	52	12	0.5
F:\landscape\forest_land	8562	cls_2	0.0104	52	12	0.5
F:\landscape\forest_land	872	cls_3	0.0104	52	12.8062	0.5
F:\landscape\forest_land	3553	cls_3	0.0112	52	13.4164	0.464286
F:\landscape\forest_land	2458	cls_3	0.0104	52	14.1421	0.5
F:\landscape\forest_land	5019	cls_3	0.0112	52	15.2315	0.464286
F:\landscape\forest_land	2254	cls_3	0.0116	52	16.9706	0.448276
F:\landscape\forest_land	3373	cls_3	0.0116	52	17.088	0.448276
F:\landscape\forest_land	10394	cls_2	0.0116	52	18	0.448276
F:\landscape\forest_land	4114	cls_3	0.0108	52	18.1108	0.481481
F:\landscape\forest_land	4016	cls_3	0.0104	52	18.4391	0.5
F:\landscape\forest_land	7339	cls_3	0.012	52	20.0998	0.433333
F:\landscape\forest_land	5003	cls_2	0.0112	52	21.2603	0.464286
F:\landscape\forest_land	8659	cls_2	0.012	52	21.5407	0.433333
F:\landscape\forest_land	9644	cls_4	0.0108	52	22	0.481481
F:\landscape\forest_land	4245	cls_2	0.0116	52	22	0.448276
F:\landscape\forest_land	8939	cls_2	0.012	52	22	0.433333
F:\landscape\forest_land	8271	cls_2	0.0104	52	27.7849	0.5
F:\landscape\forest_land	8263	cls_3	0.0116	52	30.0666	0.448276
F:\landscape\forest_land	8191	cls_3	0.0116	52	32	0.448276
F:\landscape\forest_land	8673	cls_3	0.0108	52	32.249	0.481481
F:\landscape\forest_land	6581	cls_2	0.0108	52	33.5261	0.481481
F:\landscape\forest_land	7794	cls_3	0.0116	52	34.0588	0.448276
F:\landscape\forest_land	7730	cls_3	0.012	52	36.2215	0.433333
F:\landscape\forest_land	3147	cls_3	0.0116	52	38.4708	0.448276
F:\landscape\forest_land	8832	cls_3	0.0112	52	50.3587	0.464286
F:\landscape\forest_land	5624	cls_3	0.0104	52	52.8015	0.5
F:\landscape\forest_land	5477	cls_3	0.0116	52	56.356	0.448276
F:\landscape\forest_land	6887	cls_2	0.0108	52	63.6553	0.481481
F:\landscape\forest_land	3533	cls_3	0.0104	52	64.622	0.5
F:\landscape\forest_land	3094	cls_3	0.0104	52	68.2642	0.5
F:\landscape\forest_land	8221	cls_3	0.0104	52	76.9415	0.5
F:\landscape\forest_land	4157	cls_3	0.0112	52	118.271	0.464286
F:\landscape\forest_land	3805	cls_3	0.0104	52	179.978	0.5
F:\landscape\forest_land	9185	cls_3	0.0108	52	201.762	0.481481
F:\landscape\forest_land	3200	cls_2	0.0104	52	278.776	0.5
F:\landscape\forest_land	11267	cls_1	0.848	440	116	0.0518868
F:\landscape\forest_land	10333	cls_3	0.1372	180	16	0.131195
F:\landscape\forest_land	9102	cls_3	0.068	128	10	0.188235
F:\landscape\forest_land	9480	cls_3	0.0692	128	12	0.184971
F:\landscape\forest_land	3413	cls_2	0.0708	128	20	0.180791
F:\landscape\forest_land	11071	cls_3	0.0712	128	22.3607	0.179775
F:\landscape\forest_land	250	cls_1	0.6444	384	81.4371	0.0595903
F:\landscape\forest_land	360	cls_3	0.4808	332	178.718	0.0690516
F:\landscape\forest_land	2554	cls_2	0.0232	76	4	0.327586
F:\landscape\forest_land	5829	cls_3	0.0248	76	4	0.306452
F:\landscape\forest_land	11685	cls_2	0.024	76	4.4721	0.316667
F:\landscape\forest_land	1870	cls_4	0.024	76	4.4721	0.316667
F:\landscape\forest_land	3541	cls_3	0.0256	76	7.2111	0.296875
F:\landscape\forest_land	11837	cls_2	0.0232	76	8	0.327586
F:\landscape\forest_land	415	cls_2	0.0228	76	14	0.333333
F:\landscape\forest_land	9394	cls_3	0.0228	76	15.2315	0.333333
F:\landscape\forest_land	2430	cls_2	0.0968	152	15.2315	0.157025
F:\landscape\forest_land	9427	cls_1	0.024	76	20	0.316667
F:\landscape\forest_land	902	cls_3	0.0984	152	24.3311	0.154472
F:\landscape\forest_land	5092	cls_1	0.0968	152	29.5296	0.157025
F:\landscape\forest_land	2181	cls_3	0.0228	76	37.9473	0.333333
F:\landscape\forest_land	6607	cls_2	0.024	76	42.3792	0.316667
F:\landscape\forest_land	1454	cls_3	0.1008	152	69.3397	0.150794
F:\landscape\forest_land	4610	cls_2	0.0232	76	98.326	0.327586
F:\landscape\forest_land	2636	cls_3	0.0256	76	112.089	0.296875
F:\landscape\forest_land	10356	cls_3	0.0252	76	170.012	0.301587
F:\landscape\forest_land	11280	cls_3	0.226	228	298.329	0.100885
F:\landscape\forest_land	7174	cls_3	0.0436	100	8	0.229358
F:\landscape\forest_land	10204	cls_3	0.0416	100	26	0.240385
F:\landscape\forest_land	8404	cls_3	0.0408	100	26.6833	0.245098
F:\landscape\forest_land	1431	cls_3	3.146	848	168.867	0.0269549
F:\landscape\forest_land	4226	cls_3	0.064	124	24.0832	0.19375
F:\landscape\forest_land	7053	cls_3	0.0676	124	24.7386	0.183432
F:\landscape\forest_land	6291	cls_3	0.0636	124	41.7612	0.194969
F:\landscape\forest_land	5238	cls_3	0.0908	148	30	0.162996
F:\landscape\forest_land	5153	cls_1	0.8212	436	20.3961	0.053093
F:\landscape\forest_land	10349	cls_3	0.0084	48	4	0.571429
F:\landscape\forest_land	11544	cls_2	0.0084	48	4	0.571429
F:\landscape\forest_land	6766	cls_3	0.0084	48	4	0.571429
F:\landscape\forest_land	3506	cls_3	0.0096	48	4	0.5
F:\landscape\forest_land	8265	cls_3	0.0092	48	4	0.521739
F:\landscape\forest_land	9947	cls_3	0.0096	48	4	0.5
F:\landscape\forest_land	7343	cls_3	0.01	48	4	0.48
F:\landscape\forest_land	7646	cls_3	0.0208	72	4	0.346154
F:\landscape\forest_land	7762	cls_1	0.0084	48	4.4721	0.571429
F:\landscape\forest_land	2873	cls_4	0.0084	48	4.4721	0.571429
F:\landscape\forest_land	5274	cls_3	0.0096	48	4.4721	0.5
F:\landscape\forest_land	9072	cls_3	0.0096	48	4.4721	0.5
F:\landscape\forest_land	9019	cls_3	0.01	48	4.4721	0.48
F:\landscape\forest_land	8870	cls_3	0.0208	72	4.4721	0.346154
F:\landscape\forest_land	11624	cls_3	0.0868	144	4.4721	0.165899
F:\landscape\forest_land	3542	cls_3	0.0088	48	5.6569	0.545455
F:\landscape\forest_land	10384	cls_3	0.0096	48	5.6569	0.5
F:\landscape\forest_land	1340	cls_1	0.0092	48	5.6569	0.521739
F:\landscape\forest_land	10182	cls_1	0.0092	48	6	0.521739
F:\landscape\forest_land	4276	cls_3	0.0092	48	6	0.521739
F:\landscape\forest_land	9025	cls_3	0.0084	48	6	0.571429
F:\landscape\forest_land	3375	cls_3	0.0088	48	6	0.545455
F:\landscape\forest_land	9376	cls_3	0.0088	48	6	0.545455
F:\landscape\forest_land	2772	cls_3	0.0092	48	6	0.521739
F:\landscape\forest_land	1780	cls_4	0.0092	48	6	0.521739
F:\landscape\forest_land	6965	cls_3	0.0084	48	6.3246	0.571429
F:\landscape\forest_land	3192	cls_3	0.0092	48	6.3246	0.521739
F:\landscape\forest_land	2809	cls_4	0.0024	24	7.2111	1
F:\landscape\forest_land	5342	cls_3	0.0088	48	7.2111	0.545455
F:\landscape\forest_land	7257	cls_3	0.0088	48	7.2111	0.545455
F:\landscape\forest_land	1908	cls_4	0.01	48	7.2111	0.48
F:\landscape\forest_land	3224	cls_3	0.0096	48	7.2111	0.5
F:\landscape\forest_land	2031	cls_2	0.0092	48	7.2111	0.521739
F:\landscape\forest_land	9443	cls_3	0.0084	48	8	0.571429
F:\landscape\forest_land	5208	cls_3	0.01	48	8	0.48
F:\landscape\forest_land	9718	cls_3	0.0096	48	8.2462	0.5
F:\landscape\forest_land	7898	cls_2	0.0084	48	8.4853	0.571429
F:\landscape\forest_land	10730	cls_3	0.022	72	8.4853	0.327273
F:\landscape\forest_land	5967	cls_2	0.0088	48	8.9443	0.545455
F:\landscape\forest_land	6847	cls_2	0.0096	48	8.9443	0.5
F:\landscape\forest_land	5620	cls_2	0.0088	48	10	0.545455
F:\landscape\forest_land	7547	cls_3	0.0096	48	10	0.5
F:\landscape\forest_land	7751	cls_3	0.0092	48	10	0.521739
F:\landscape\forest_land	3965	cls_2	0.0212	72	10	0.339623
F:\landscape\forest_land	2540	cls_3	0.0376	96	10	0.255319
F:\landscape\forest_land	4181	cls_3	0.0092	48	10.7703	0.521739
F:\landscape\forest_land	2704	cls_4	0.0096	48	11.6619	0.5
F:\landscape\forest_land	2862	cls_3	0.0624	120	11.6619	0.192308
F:\landscape\forest_land	4256	cls_3	0.022	72	12	0.327273
F:\landscape\forest_land	9163	cls_3	0.0872	144	12	0.165138
F:\landscape\forest_land	6562	cls_3	0.01	48	12.1655	0.48
F:\landscape\forest_land	6955	cls_3	0.01	48	12.1655	0.48
F:\landscape\forest_land	6401	cls_4	0.0092	48	12.6491	0.521739
F:\landscape\forest_land	3912	cls_2	0.0088	48	13.4164	0.545455
F:\landscape\forest_land	5743	cls_2	0.1976	216	14	0.109312
F:\landscape\forest_land	3992	cls_3	0.0096	48	15.6205	0.5
F:\landscape\forest_land	11790	cls_1	0.1548	192	15.6205	0.124031
F:\landscape\forest_land	7307	cls_3	0.1988	216	15.6205	0.108652
F:\landscape\forest_land	4823	cls_4	0.0084	48	16	0.571429
F:\landscape\forest_land	3886	cls_3	0.0216	72	16	0.333333
F:\landscape\forest_land	10084	cls_3	0.022	72	16.1245	0.327273
F:\landscape\forest_land	8848	cls_3	0.0216	72	16.4924	0.333333
F:\landscape\forest_land	3471	cls_3	0.0592	120	16.4924	0.202703
F:\landscape\forest_land	2882	cls_2	0.02	72	17.2047	0.36
F:\landscape\forest_land	2685	cls_3	0.0084	48	17.8885	0.571429
F:\landscape\forest_land	5225	cls_3	0.04	96	17.8885	0.24
F:\landscape\forest_land	7748	cls_1	0.0604	120	17.8885	0.198676
F:\landscape\forest_land	2897	cls_2	0.0092	48	18.868	0.521739
F:\landscape\forest_land	11381	cls_3	0.04	96	18.868	0.24
F:\landscape\forest_land	9006	cls_3	0.0092	48	19.6977	0.521739
F:\landscape\forest_land	11121	cls_3	0.1212	168	19.6977	0.138614
F:\landscape\forest_land	156	cls_2	0.0204	72	20.0998	0.352941
F:\landscape\forest_land	10494	cls_3	0.0852	144	20.0998	0.169014
F:\landscape\forest_land	4335	cls_2	0.0084	48	20.3961	0.571429
F:\landscape\forest_land	4777	cls_3	0.0084	48	22	0.571429
F:\landscape\forest_land	5036	cls_3	0.0092	48	22	0.521739
F:\landscape\forest_land	10491	cls_3	0.0084	48	24	0.571429
F:\landscape\forest_land	11094	cls_3	0.0368	96	25.0599	0.26087
F:\landscape\forest_land	7370	cls_3	0.0088	48	25.2982	0.545455
F:\landscape\forest_land	3184	cls_4	0.0092	48	26.8328	0.521739
F:\landscape\forest_land	6588	cls_3	0.0096	48	26.8328	0.5
F:\landscape\forest_land	43	cls_1	0.0584	120	27.2029	0.205479
F:\landscape\forest_land	5049	cls_3	0.0084	48	28.0713	0.571429
F:\landscape\forest_land	7958	cls_2	0.01	48	28.0713	0.48
F:\landscape\forest_land	3918	cls_3	0.02	72	31.305	0.36
F:\landscape\forest_land	10769	cls_2	0.01	48	32	0.48
F:\landscape\forest_land	3799	cls_2	0.0092	48	32.249	0.521739
F:\landscape\forest_land	399	cls_3	0.02	72	33.9411	0.36
F:\landscape\forest_land	3920	cls_3	0.0216	72	36	0.333333
F:\landscape\forest_land	11698	cls_1	0.0364	96	36	0.263736
F:\landscape\forest_land	6695	cls_3	0.0088	48	36.0555	0.545455
F:\landscape\forest_land	3890	cls_3	0.0092	48	36.4966	0.521739
F:\landscape\forest_land	4988	cls_1	0.0096	48	37.3631	0.5
F:\landscape\forest_land	41	cls_1	0.04	96	40	0.24
F:\landscape\forest_land	4068	cls_2	0.0088	48	42	0.545455
F:\landscape\forest_land	10605	cls_3	0.0372	96	43.6807	0.258065
F:\landscape\forest_land	10076	cls_3	0.0088	48	44.9444	0.545455
F:\landscape\forest_land	4297	cls_2	0.0088	48	46.1736	0.545455
F:\landscape\forest_land	5935	cls_3	0.01	48	46.8188	0.48
F:\landscape\forest_land	8142	cls_3	0.0092	48	56.5685	0.521739
F:\landscape\forest_land	3045	cls_3	0.0084	48	66	0.571429
F:\landscape\forest_land	4167	cls_3	0.0084	48	66	0.571429
F:\landscape\forest_land	10740	cls_3	0.01	48	66.2722	0.48
F:\landscape\forest_land	10556	cls_3	0.0096	48	66.4831	0.5
F:\landscape\forest_land	5776	cls_3	0.0096	48	73.3485	0.5
F:\landscape\forest_land	9750	cls_3	0.0592	120	73.4302	0.202703
F:\landscape\forest_land	9599	cls_3	0.0084	48	87.2009	0.571429
F:\landscape\forest_land	7287	cls_3	0.0092	48	110	0.521739
F:\landscape\forest_land	7558	cls_3	0.0084	48	133.462	0.571429
F:\landscape\forest_land	10566	cls_3	0.0204	72	142.773	0.352941
F:\landscape\forest_land	4404	cls_3	0.0088	48	146.479	0.545455
F:\landscape\forest_land	4758	cls_3	0.022	72	157.582	0.327273
F:\landscape\forest_land	2	cls_1	0.0092	48	186.011	0.521739
F:\landscape\forest_land	2525	cls_3	0.0084	48	189.789	0.571429
F:\landscape\forest_land	6839	cls_3	0.0088	48	201.157	0.545455
F:\landscape\forest_land	8953	cls_2	0.1176	168	384.089	0.142857
F:\landscape\forest_land	2709	cls_2	0.0092	48	594.108	0.521739
F:\landscape\forest_land	10733	cls_3	0.188	212	11.6619	0.112766
F:\landscape\forest_land	9592	cls_1	0.1508	188	170.88	0.124668
F:\landscape\forest_land	5176	cls_3	0.1472	188	1118.4	0.127717
F:\landscape\forest_land	4796	cls_2	0.1132	164	12	0.144876
F:\landscape\forest_land	7895	cls_3	0.1104	164	30	0.148551
F:\landscape\forest_land	2135	cls_2	0.0792	140	14.5602	0.176768
F:\landscape\forest_land	10305	cls_3	0.0832	140	140.014	0.168269
F:\landscape\forest_land	3435	cls_2	0.2768	256	17.8885	0.0924855
F:\landscape\forest_land	490	cls_4	0.056	116	4	0.207143
F:\landscape\forest_land	2769	cls_3	0.0572	116	6	0.202797
F:\landscape\forest_land	1213	cls_1	0.0568	116	16	0.204225
F:\landscape\forest_land	723	cls_2	0.226	232	23.4094	0.102655
F:\landscape\forest_land	3162	cls_3	0.0568	116	36	0.204225
F:\landscape\forest_land	9881	cls_2	3.3036	880	16.9706	0.0266376
F:\landscape\forest_land	9990	cls_3	0.1828	208	8	0.113786
F:\landscape\forest_land	719	cls_1	0.0352	92	11.3137	0.261364
F:\landscape\forest_land	5100	cls_3	0.0336	92	16.1245	0.27381
F:\landscape\forest_land	6830	cls_3	0.034	92	18	0.270588
F:\landscape\forest_land	5878	cls_2	0.034	92	19.6977	0.270588
F:\landscape\forest_land	5395	cls_3	0.0352	92	26	0.261364
F:\landscape\forest_land	2881	cls_3	0.036	92	30.4631	0.255556
F:\landscape\forest_land	6705	cls_3	0.0352	92	42.5206	0.261364
F:\landscape\forest_land	1287	cls_3	0.0332	92	72.2496	0.277108
F:\landscape\forest_land	4146	cls_3	0.3164	276	73.7564	0.0872313
F:\landscape\forest_land	7462	cls_3	0.0332	92	81.6333	0.277108
F:\landscape\forest_land	3662	cls_1	0.108	160	58.1378	0.148148
F:\landscape\forest_land	7377	cls_1	0.6248	388	45.607	0.0620999
F:\landscape\forest_land	11457	cls_2	0.2152	228	24.0832	0.105948
F:\landscape\forest_land	8278	cls_4	0.0192	68	4	0.354167
F:\landscape\forest_land	8274	cls_2	0.0172	68	4	0.395349
F:\landscape\forest_land	5359	cls_2	0.0172	68	4.4721	0.395349
F:\landscape\forest_land	2232	cls_3	0.018	68	6.3246	0.377778
F:\landscape\forest_land	3657	cls_2	0.0196	68	6.3246	0.346939
F:\landscape\forest_land	11803	cls_1	0.0188	68	8.2462	0.361702
F:\landscape\forest_land	6069	cls_3	0.018	68	10	0.377778
F:\landscape\forest_land	4529	cls_3	0.0196	68	10.198	0.346939
F:\landscape\forest_land	2317	cls_3	0.0172	68	12	0.395349
F:\landscape\forest_land	604	cls_2	0.018	68	12	0.377778
F:\landscape\forest_land	10132	cls_3	0.0188	68	15.2315	0.361702
F:\landscape\forest_land	4889	cls_3	0.018	68	17.088	0.377778
F:\landscape\forest_land	6805	cls_3	0.0172	68	18.4391	0.395349
F:\landscape\forest_land	4367	cls_3	0.0196	68	18.868	0.346939
F:\landscape\forest_land	1839	cls_3	0.0172	68	22	0.395349
F:\landscape\forest_land	3261	cls_3	0.018	68	24.0832	0.377778
F:\landscape\forest_land	9419	cls_3	0.0188	68	26.0768	0.361702
F:\landscape\forest_land	11804	cls_1	0.0768	136	28	0.177083
F:\landscape\forest_land	7283	cls_3	0.0188	68	32	0.361702
F:\landscape\forest_land	4491	cls_3	0.018	68	34	0.377778
F:\landscape\forest_land	8105	cls_3	0.0176	68	36.7696	0.386364
F:\landscape\forest_land	4109	cls_2	0.018	68	38	0.377778
F:\landscape\forest_land	2557	cls_2	0.0184	68	44	0.369565
F:\landscape\forest_land	4973	cls_2	0.018	68	48.1664	0.377778
F:\landscape\forest_land	9613	cls_3	0.0172	68	75.1532	0.395349
F:\landscape\forest_land	6570	cls_3	0.0176	68	96	0.386364
F:\landscape\forest_land	3468	cls_2	0.0784	136	106.302	0.173469
F:\landscape\forest_land	10527	cls_2	0.018	68	109.563	0.377778
F:\landscape\forest_land	3417	cls_2	0.0184	68	122.589	0.369565
F:\landscape\forest_land	11586	cls_3	0.0776	136	282.708	0.175258
F:\landscape\forest_land	3074	cls_3	0.132	180	8	0.136364
F:\landscape\forest_land	9414	cls_3	0.132	180	41.1825	0.136364
F:\landscape\forest_land	9528	cls_3	0.05	112	4	0.224
F:\landscape\forest_land	9977	cls_3	0.0524	112	110.309	0.21374
F:\landscape\forest_land	4424	cls_2	0.0496	112	242.685	0.225806
F:\landscape\forest_land	2167	cls_2	0.1012	156	10	0.15415
F:\landscape\forest_land	2148	cls_3	0.0964	156	12.8062	0.161826
F:\landscape\forest_land	9654	cls_3	0.102	156	18	0.152941
F:\landscape\forest_land	9289	cls_3	0.098	156	66.6033	0.159184
F:\landscape\forest_land	11404	cls_3	0.1616	200	18.4391	0.123762
F:\landscape\forest_land	8296	cls_3	0.2408	244	20	0.101329
F:\landscape\forest_land	10054	cls_3	0.3388	288	21.6333	0.0850059
F:\landscape\forest_land	3621	cls_3	0.0072	44	4	0.611111
F:\landscape\forest_land	8934	cls_3	0.0068	44	4	0.647059
F:\landscape\forest_land	7342	cls_3	0.0076	44	4	0.578947
F:\landscape\forest_land	7812	cls_3	0.008	44	4	0.55
F:\landscape\forest_land	9529	cls_3	0.008	44	4	0.55
F:\landscape\forest_land	7877	cls_3	0.0076	44	4	0.578947
F:\landscape\forest_land	1982	cls_1	0.0076	44	4	0.578947
F:\landscape\forest_land	4530	cls_2	0.0072	44	4	0.611111
F:\landscape\forest_land	6361	cls_2	0.0076	44	4	0.578947
F:\landscape\forest_land	10976	cls_2	0.0072	44	4	0.611111
F:\landscape\forest_land	6659	cls_3	0.0076	44	4	0.578947
F:\landscape\forest_land	11562	cls_3	0.008	44	4	0.55
F:\landscape\forest_land	4303	cls_2	0.0068	44	4.4721	0.647059
F:\landscape\forest_land	11210	cls_1	0.0076	44	4.4721	0.578947
F:\landscape\forest_land	10993	cls_2	0.008	44	4.4721	0.55
F:\landscape\forest_land	7955	cls_3	0.008	44	4.4721	0.55
F:\landscape\forest_land	7922	cls_3	0.0076	44	4.4721	0.578947
F:\landscape\forest_land	9467	cls_3	0.0296	88	4.4721	0.297297
F:\landscape\forest_land	959	cls_2	0.0068	44	5.6569	0.647059
F:\landscape\forest_land	9407	cls_2	0.0076	44	5.6569	0.578947
F:\landscape\forest_land	9378	cls_3	0.0072	44	6	0.611111
F:\landscape\forest_land	2929	cls_3	0.0068	44	6	0.647059
F:\landscape\forest_land	7699	cls_3	0.0072	44	6	0.611111
F:\landscape\forest_land	4936	cls_3	0.0072	44	6	0.611111
F:\landscape\forest_land	4471	cls_2	0.0076	44	6	0.578947
F:\landscape\forest_land	412	cls_2	0.0296	88	6	0.297297
F:\landscape\forest_land	7095	cls_3	0.0068	44	6.3246	0.647059
F:\landscape\forest_land	9129	cls_3	0.0068	44	6.3246	0.647059
F:\landscape\forest_land	3773	cls_1	0.0076	44	6.3246	0.578947
F:\landscape\forest_land	6456	cls_3	0.0076	44	6.3246	0.578947
F:\landscape\forest_land	2736	cls_3	0.0076	44	7.2111	0.578947
F:\landscape\forest_land	7024	cls_3	0.008	44	7.2111	0.55
F:\landscape\forest_land	6990	cls_3	0.0076	44	7.2111	0.578947
F:\landscape\forest_land	610	cls_1	0.008	44	8	0.55
F:\landscape\forest_land	8362	cls_3	0.008	44	8	0.55
F:\landscape\forest_land	8077	cls_2	0.0072	44	8	0.611111
F:\landscape\forest_land	4712	cls_3	0.0072	44	8	0.611111
F:\landscape\forest_land	7134	cls_3	0.0324	88	8	0.271605
F:\landscape\forest_land	1238	cls_3	0.0684	132	8	0.192982
F:\landscape\forest_land	8335	cls_3	0.0068	44	8.4853	0.647059
F:\landscape\forest_land	1633	cls_1	0.0072	44	10	0.611111
F:\landscape\forest_land	3442	cls_2	0.0072	44	10	0.611111
F:\landscape\forest_land	9235	cls_3	0.008	44	10	0.55
F:\landscape\forest_land	7097	cls_3	0.0072	44	10	0.611111
F:\landscape\forest_land	9927	cls_3	0.0308	88	10	0.285714
F:\landscape\forest_land	9004	cls_3	0.0716	132	10	0.184358
F:\landscape\forest_land	707	cls_1	0.07	132	10	0.188571
F:\landscape\forest_land	7206	cls_3	0.0072	44	10.198	0.611111
F:\landscape\forest_land	4811	cls_3	0.008	44	10.7703	0.55
F:\landscape\forest_land	5845	cls_3	0.0072	44	11.3137	0.611111
F:\landscape\forest_land	1404	cls_3	0.0076	44	11.6619	0.578947
F:\landscape\forest_land	217	cls_3	0.008	44	11.6619	0.55
F:\landscape\forest_land	2192	cls_2	0.0068	44	12	0.647059
F:\landscape\forest_land	11087	cls_3	0.0292	88	12	0.30137
F:\landscape\forest_land	4512	cls_3	0.0068	44	12.1655	0.647059
F:\landscape\forest_land	7039	cls_3	0.008	44	12.1655	0.55
F:\landscape\forest_land	3243	cls_4	0.0076	44	12.6491	0.578947
F:\landscape\forest_land	5219	cls_3	0.0068	44	12.8062	0.647059
F:\landscape\forest_land	6600	cls_3	0.0304	88	12.8062	0.289474
F:\landscape\forest_land	1230	cls_1	0.0076	44	13.4164	0.578947
F:\landscape\forest_land	3561	cls_3	0.0068	44	13.4164	0.647059
F:\landscape\forest_land	11062	cls_2	0.0072	44	14.1421	0.611111
F:\landscape\forest_land	4075	cls_3	0.0068	44	14.4222	0.647059
F:\landscape\forest_land	10148	cls_3	0.008	44	14.5602	0.55
F:\landscape\forest_land	1848	cls_3	0.03	88	15.2315	0.293333
F:\landscape\forest_land	9048	cls_3	0.0072	44	16.4924	0.611111
F:\landscape\forest_land	4039	cls_2	0.0068	44	16.4924	0.647059
F:\landscape\forest_land	2960	cls_3	0.0072	44	17.2047	0.611111
F:\landscape\forest_land	8307	cls_3	0.0072	44	18	0.611111
F:\landscape\forest_land	7226	cls_3	0.008	44	18.868	0.55
F:\landscape\forest_land	2551	cls_3	0.0704	132	18.9737	0.1875
F:\landscape\forest_land	2852	cls_2	0.0308	88	19.6977	0.285714
F:\landscape\forest_land	2440	cls_2	0.0308	88	20.3961	0.285714
F:\landscape\forest_land	4155	cls_2	0.0072	44	21.5407	0.611111
F:\landscape\forest_land	1736	cls_4	0.0076	44	22.0907	0.578947
F:\landscape\forest_land	7724	cls_2	0.0068	44	22.3607	0.647059
F:\landscape\forest_land	10251	cls_3	0.0068	44	23.4094	0.647059
F:\landscape\forest_land	8849	cls_3	0.0072	44	23.4094	0.611111
F:\landscape\forest_land	1676	cls_3	0.0068	44	25.4558	0.647059
F:\landscape\forest_land	2883	cls_4	0.0068	44	26	0.647059
F:\landscape\forest_land	9097	cls_3	0.03	88	28	0.293333
F:\landscape\forest_land	7389	cls_2	0.0076	44	29.5296	0.578947
F:\landscape\forest_land	10646	cls_2	0.03	88	30	0.293333
F:\landscape\forest_land	2951	cls_3	0.0068	44	30.2655	0.647059
F:\landscape\forest_land	10413	cls_3	0.008	44	32.5576	0.55
F:\landscape\forest_land	6656	cls_3	0.0292	88	33.1059	0.30137
F:\landscape\forest_land	10598	cls_3	0.008	44	36.0555	0.55
F:\landscape\forest_land	9966	cls_3	0.0068	44	40	0.647059
F:\landscape\forest_land	5020	cls_2	0.008	44	41.2311	0.55
F:\landscape\forest_land	8714	cls_3	0.0324	88	46.1736	0.271605
F:\landscape\forest_land	8138	cls_3	0.0076	44	50.9902	0.578947
F:\landscape\forest_land	2942	cls_3	0.0316	88	57.5847	0.278481
F:\landscape\forest_land	10058	cls_3	0.0076	44	58.1378	0.578947
F:\landscape\forest_land	884	cls_3	0.0068	44	58.8218	0.647059
F:\landscape\forest_land	6834	cls_3	0.008	44	58.8218	0.55
F:\landscape\forest_land	6032	cls_2	0.008	44	59.6657	0.55
F:\landscape\forest_land	1617	cls_4	0.0076	44	60	0.578947
F:\landscape\forest_land	8890	cls_3	0.0072	44	66.2118	0.611111
F:\landscape\forest_land	4371	cls_3	0.0072	44	69.0507	0.611111
F:\landscape\forest_land	3755	cls_3	0.0072	44	83.1865	0.611111
F:\landscape\forest_land	8969	cls_3	0.0076	44	92.6499	0.578947
F:\landscape\forest_land	6217	cls_2	0.008	44	115.395	0.55
F:\landscape\forest_land	9833	cls_3	0.008	44	121.276	0.55
F:\landscape\forest_land	7956	cls_3	0.0072	44	127.138	0.611111
F:\landscape\forest_land	6726	cls_3	0.0068	44	141.662	0.647059
F:\landscape\forest_land	6536	cls_3	0.008	44	180.71	0.55
F:\landscape\forest_land	3225	cls_3	0.0316	88	185.084	0.278481
F:\landscape\forest_land	5103	cls_2	0.0072	44	220.952	0.611111
F:\landscape\forest_land	2961	cls_2	0.0076	44	344.262	0.578947
F:\landscape\forest_land	3231	cls_2	0.0068	44	377.211	0.647059
F:\landscape\forest_land	3842	cls_1	2.7228	812	16.1245	0.0298222
F:\landscape\forest_land	4694	cls_3	0.1544	196	8.2462	0.126943
F:\landscape\forest_land	8432	cls_3	0.1528	196	80.4984	0.128272
F:\landscape\forest_land	2410	cls_1	2.9896	848	50.04	0.028365
F:\landscape\forest_land	2512	cls_1	0.38	304	17.088	0.08
F:\landscape\forest_land	9900	cls_3	0.0912	152	18	0.166667
F:\landscape\forest_land	3339	cls_3	0.0916	152	40.2492	0.165939
F:\landscape\forest_land	1977	cls_3	0.0928	152	95.352	0.163793
F:\landscape\forest_land	660	cls_3	0.0904	152	301.204	0.168142
F:\landscape\forest_land	8295	cls_2	0.0444	108	4	0.243243
F:\landscape\forest_land	10774	cls_3	0.0444	108	8	0.243243
F:\landscape\forest_land	11141	cls_2	0.046	108	10	0.234783
F:\landscape\forest_land	3707	cls_2	0.048	108	12	0.225
F:\landscape\forest_land	10903	cls_2	0.0444	108	14.5602	0.243243
F:\landscape\forest_land	11758	cls_3	0.0472	108	14.5602	0.228814
F:\landscape\forest_land	4511	cls_2	0.0472	108	24	0.228814
F:\landscape\forest_land	6934	cls_3	0.0472	108	30.2655	0.228814
F:\landscape\forest_land	11702	cls_3	0.0452	108	32.8024	0.238938
F:\landscape\forest_land	9922	cls_3	0.0476	108	34	0.226891
F:\landscape\forest_land	5972	cls_3	0.0476	108	86.0233	0.226891
F:\landscape\forest_land	2791	cls_3	0.1936	216	128.763	0.11157
F:\landscape\forest_land	5123	cls_3	0.1216	172	24	0.141447
F:\landscape\forest_land	9582	cls_3	0.1188	172	24	0.144781
F:\landscape\forest_land	1773	cls_2	0.1168	172	32.5576	0.14726
F:\landscape\forest_land	11417	cls_3	0.1196	172	42.7551	0.143813
F:\landscape\forest_land	259	cls_1	0.1224	172	68.8767	0.140523
F:\landscape\forest_land	9524	cls_1	0.6756	408	16.1245	0.0603908
F:\landscape\forest_land	11096	cls_3	0.2296	236	160.012	0.102787
F:\landscape\forest_land	8988	cls_3	0.0156	64	6.3246	0.410256
F:\landscape\forest_land	9308	cls_3	0.0148	64	6.3246	0.432432
F:\landscape\forest_land	9426	cls_3	0.016	64	8	0.4
F:\landscape\forest_land	7155	cls_3	0.0152	64	8.4853	0.421053
F:\landscape\forest_land	4065	cls_2	0.0148	64	10	0.432432
F:\landscape\forest_land	7832	cls_2	0.0152	64	10	0.421053
F:\landscape\forest_land	8589	cls_3	0.0168	64	10	0.380952
F:\landscape\forest_land	373	cls_1	0.016	64	10.198	0.4
F:\landscape\forest_land	9565	cls_3	0.016	64	10.7703	0.4
F:\landscape\forest_land	5404	cls_2	0.0156	64	10.7703	0.410256
F:\landscape\forest_land	1715	cls_3	0.8248	448	12	0.0543162
F:\landscape\forest_land	3163	cls_2	0.0152	64	12.6491	0.421053
F:\landscape\forest_land	7937	cls_2	0.0148	64	14	0.432432
F:\landscape\forest_land	2426	cls_2	0.0148	64	14	0.432432
F:\landscape\forest_land	10676	cls_3	0.016	64	14	0.4
F:\landscape\forest_land	2958	cls_2	0.0156	64	14.4222	0.410256
F:\landscape\forest_land	10338	cls_3	0.1516	192	16	0.126649
F:\landscape\forest_land	9673	cls_3	0.0156	64	18.1108	0.410256
F:\landscape\forest_land	9633	cls_3	0.066	128	20	0.193939
F:\landscape\forest_land	9880	cls_4	0.016	64	21.2603	0.4
F:\landscape\forest_land	4248	cls_3	0.016	64	25.6125	0.4
F:\landscape\forest_land	7550	cls_3	0.016	64	26.0768	0.4
F:\landscape\forest_land	4409	cls_3	0.0168	64	28	0.380952
F:\landscape\forest_land	6397	cls_3	0.0156	64	30	0.410256
F:\landscape\forest_land	6096	cls_3	0.0152	64	30.4631	0.421053
F:\landscape\forest_land	2814	cls_3	0.0156	64	32.249	0.410256
F:\landscape\forest_land	3955	cls_3	0.016	64	34.9285	0.4
F:\landscape\forest_land	10584	cls_3	0.0152	64	36.0555	0.421053
F:\landscape\forest_land	9214	cls_2	0.0156	64	36.7151	0.410256
F:\landscape\forest_land	4460	cls_3	0.0672	128	36.7696	0.190476
F:\landscape\forest_land	5424	cls_2	0.0152	64	37.7359	0.421053
F:\landscape\forest_land	6086	cls_2	0.016	64	42.5206	0.4
F:\landscape\forest_land	8363	cls_2	0.0148	64	46.0435	0.432432
F:\landscape\forest_land	9957	cls_3	0.0152	64	58.8218	0.421053
F:\landscape\forest_land	3832	cls_3	0.0148	64	72.4983	0.432432
F:\landscape\forest_land	11715	cls_3	0.0156	64	134.833	0.410256
F:\landscape\forest_land	2682	cls_2	0.016	64	232.5	0.4
F:\landscape\forest_land	9663	cls_3	0.0872	148	34	0.169725
F:\landscape\forest_land	2483	cls_1	0.0884	148	38.833	0.167421
F:\landscape\forest_land	10535	cls_3	0.0892	148	111.803	0.165919
F:\landscape\forest_land	3246	cls_3	0.0896	148	134.893	0.165179
F:\landscape\forest_land	11172	cls_3	0.088	148	237.394	0.168182
F:\landscape\forest_land	9537	cls_1	1.5208	612	14	0.040242
F:\landscape\forest_land	11036	cls_3	0.4076	316	25.6125	0.077527
F:\landscape\forest_land	475	cls_1	0.0268	84	4.4721	0.313433
F:\landscape\forest_land	10072	cls_3	0.026	84	4.4721	0.323077
F:\landscape\forest_land	3345	cls_3	0.0272	84	6.3246	0.308824
F:\landscape\forest_land	7187	cls_2	0.0264	84	8	0.318182
F:\landscape\forest_land	9197	cls_4	0.026	84	10	0.323077
F:\landscape\forest_land	4737	cls_4	0.45	336	10.198	0.0746667
F:\landscape\forest_land	1457	cls_3	0.026	84	10.7703	0.323077
F:\landscape\forest_land	6491	cls_3	0.0284	84	12	0.295775
F:\landscape\forest_land	10361	cls_3	0.028	84	12.8062	0.3
F:\landscape\forest_land	8824	cls_2	0.0272	84	14.5602	0.308824
F:\landscape\forest_land	10259	cls_3	0.0276	84	18	0.304348
F:\landscape\forest_land	5543	cls_2	0.0276	84	19.6977	0.304348
F:\landscape\forest_land	1555	cls_2	0.0284	84	20	0.295775
F:\landscape\forest_land	5473	cls_2	0.026	84	22	0.323077
F:\landscape\forest_land	9231	cls_3	0.0264	84	24	0.318182
F:\landscape\forest_land	2624	cls_3	0.0288	84	36.2215	0.291667
F:\landscape\forest_land	7969	cls_3	0.0288	84	39.6989	0.291667
F:\landscape\forest_land	2626	cls_2	0.0264	84	46.8188	0.318182
F:\landscape\forest_land	10702	cls_2	0.0276	84	69.0507	0.304348
F:\landscape\forest_land	7092	cls_3	0.0272	84	79.6241	0.308824
F:\landscape\forest_land	6746	cls_3	0.0264	84	80.05	0.318182
F:\landscape\forest_land	4195	cls_3	0.026	84	90	0.323077
F:\landscape\forest_land	10286	cls_3	0.026	84	116.619	0.323077
F:\landscape\forest_land	11705	cls_1	0.1132	168	135.882	0.14841
F:\landscape\forest_land	2839	cls_2	0.0264	84	250.727	0.318182
F:\landscape\forest_land	2146	cls_1	0.112	168	376.531	0.15
F:\landscape\forest_land	11123	cls_3	0.144	188	30.5941	0.130556
F:\landscape\forest_land	8946	cls_3	0.144	188	60	0.130556
F:\landscape\forest_land	11617	cls_3	0.5672	376	170.176	0.0662905
F:\landscape\forest_land	10261	cls_3	0.0432	104	18	0.240741
F:\landscape\forest_land	8959	cls_3	0.1744	208	30	0.119266
F:\landscape\forest_land	6634	cls_3	0.0412	104	60.4649	0.252427
F:\landscape\forest_land	5870	cls_3	0.0404	104	72.6911	0.257426
F:\landscape\forest_land	2915	cls_2	0.0428	104	84.309	0.242991
F:\landscape\forest_land	6559	cls_3	0.0412	104	265.307	0.252427
F:\landscape\forest_land	4381	cls_1	3.88	976	42	0.0251546
F:\landscape\forest_land	9201	cls_3	0.206	228	11.3137	0.11068
F:\landscape\forest_land	10184	cls_3	0.2104	228	138.058	0.108365
F:\landscape\forest_land	3892	cls_3	0.496	352	115.948	0.0709677
F:\landscape\forest_land	9462	cls_3	0.0604	124	6	0.205298
F:\landscape\forest_land	5746	cls_3	0.058	124	10.7703	0.213793
F:\landscape\forest_land	6714	cls_3	0.06	124	28	0.206667
F:\landscape\forest_land	11828	cls_2	0.0596	124	28.6356	0.208054
F:\landscape\forest_land	1284	cls_1	0.0596	124	97.0155	0.208054
F:\landscape\forest_land	5750	cls_4	0.6232	392	4	0.0629012
F:\landscape\forest_land	7071	cls_4	0.3276	288	6.3246	0.0879121
F:\landscape\forest_land	1764	cls_3	0.0788	144	8.2462	0.182741
F:\landscape\forest_land	9736	cls_2	0.082	144	10	0.17561
F:\landscape\forest_land	5701	cls_2	0.0804	144	14	0.179104
F:\landscape\forest_land	6856	cls_3	0.082	144	21.5407	0.17561
F:\landscape\forest_land	9589	cls_3	0.0816	144	26.6833	0.176471
F:\landscape\forest_land	11751	cls_3	0.0836	144	119.817	0.172249
F:\landscape\forest_land	10186	cls_3	0.3776	308	6.3246	0.0815678
F:\landscape\forest_land	4924	cls_1	0.1044	164	10.7703	0.157088
F:\landscape\forest_land	11557	cls_2	0.1352	184	18.1108	0.136095
F:\landscape\forest_land	9877	cls_3	0.13	184	26	0.141538
F:\landscape\forest_land	3300	cls_2	0.166	204	26	0.122892
F:\landscape\forest_land	3317	cls_2	0.1664	204	48.6621	0.122596
F:\landscape\forest_land	669	cls_1	0.1976	224	10	0.11336
F:\landscape\forest_land	11292	cls_3	0.194	224	22	0.115464
F:\landscape\forest_land	5684	cls_3	1.0296	508	88	0.0493396
F:\landscape\forest_land	1714	cls_4	1.8796	688	4	0.0366035
F:\landscape\forest_land	6339	cls_3	0.856	464	149.251	0.0542056
F:\landscape\forest_land	11398	cls_1	1.2708	564	11.3137	0.0443815
F:\landscape\forest_land	5329	cls_3	0.0052	40	4	0.769231
F:\landscape\forest_land	4446	cls_3	0.0064	40	4	0.625
F:\landscape\forest_land	1996	cls_3	0.0064	40	4	0.625
F:\landscape\forest_land	3254	cls_3	0.0064	40	4	0.625
F:\landscape\forest_land	2810	cls_4	0.0064	40	4	0.625
F:\landscape\forest_land	5548	cls_2	0.0064	40	4	0.625
F:\landscape\forest_land	7130	cls_3	0.006	40	4	0.666667
F:\landscape\forest_land	2831	cls_4	0.006	40	4	0.666667
F:\landscape\forest_land	5039	cls_3	0.0056	40	4	0.714286
F:\landscape\forest_land	1173	cls_1	0.006	40	4	0.666667
F:\landscape\forest_land	1031	cls_2	0.006	40	4	0.666667
F:\landscape\forest_land	3024	cls_3	0.0064	40	4	0.625
F:\landscape\forest_land	3938	cls_2	0.0136	60	4	0.441176
F:\landscape\forest_land	8773	cls_3	0.0132	60	4	0.454545
F:\landscape\forest_land	9533	cls_4	0.0144	60	4	0.416667
F:\landscape\forest_land	11590	cls_2	0.0132	60	4	0.454545
F:\landscape\forest_land	10425	cls_3	0.0256	80	4	0.3125
F:\landscape\forest_land	8154	cls_3	0.0376	100	4	0.265957
F:\landscape\forest_land	9335	cls_3	0.0052	40	4.4721	0.769231
F:\landscape\forest_land	6889	cls_2	0.0056	40	4.4721	0.714286
F:\landscape\forest_land	6667	cls_2	0.006	40	4.4721	0.666667
F:\landscape\forest_land	225	cls_3	0.0056	40	4.4721	0.714286
F:\landscape\forest_land	1776	cls_4	0.0064	40	4.4721	0.625
F:\landscape\forest_land	976	cls_2	0.0064	40	4.4721	0.625
F:\landscape\forest_land	11882	cls_1	0.006	40	4.4721	0.666667
F:\landscape\forest_land	6958	cls_3	0.0052	40	4.4721	0.769231
F:\landscape\forest_land	7396	cls_2	0.0056	40	5.6569	0.714286
F:\landscape\forest_land	4993	cls_2	0.0052	40	5.6569	0.769231
F:\landscape\forest_land	8719	cls_4	0.0056	40	5.6569	0.714286
F:\landscape\forest_land	9135	cls_3	0.0064	40	5.6569	0.625
F:\landscape\forest_land	3602	cls_2	0.0056	40	5.6569	0.714286
F:\landscape\forest_land	5680	cls_3	0.0052	40	5.6569	0.769231
F:\landscape\forest_land	435	cls_1	0.0064	40	5.6569	0.625
F:\landscape\forest_land	10481	cls_3	0.0056	40	5.6569	0.714286
F:\landscape\forest_land	2598	cls_2	0.0132	60	5.6569	0.454545
F:\landscape\forest_land	3887	cls_2	0.0128	60	5.6569	0.46875
F:\landscape\forest_land	5262	cls_4	0.0228	80	5.6569	0.350877
F:\landscape\forest_land	9387	cls_3	0.0056	40	6	0.714286
F:\landscape\forest_land	4802	cls_2	0.006	40	6	0.666667
F:\landscape\forest_land	2588	cls_4	0.0064	40	6	0.625
F:\landscape\forest_land	3631	cls_2	0.0064	40	6	0.625
F:\landscape\forest_land	1019	cls_1	0.006	40	6	0.666667
F:\landscape\forest_land	11177	cls_3	0.0128	60	6	0.46875
F:\landscape\forest_land	3214	cls_3	0.0144	60	6	0.416667
F:\landscape\forest_land	4542	cls_3	0.024	80	6	0.333333
F:\landscape\forest_land	3504	cls_4	0.0056	40	6.3246	0.714286
F:\landscape\forest_land	8972	cls_3	0.0064	40	6.3246	0.625
F:\landscape\forest_land	4704	cls_3	0.006	40	6.3246	0.666667
F:\landscape\forest_land	9799	cls_3	0.0064	40	6.3246	0.625
F:\landscape\forest_land	1823	cls_3	0.0064	40	6.3246	0.625
F:\landscape\forest_land	3702	cls_3	0.006	40	6.3246	0.666667
F:\landscape\forest_land	8382	cls_3	0.006	40	6.3246	0.666667
F:\landscape\forest_land	7385	cls_3	0.006	40	6.3246	0.666667
F:\landscape\forest_land	2781	cls_2	0.0056	40	6.3246	0.714286
F:\landscape\forest_land	578	cls_2	0.0064	40	6.3246	0.625
F:\landscape\forest_land	4963	cls_2	0.024	80	6.3246	0.333333
F:\landscape\forest_land	3196	cls_3	0.0764	140	6.3246	0.183246
F:\landscape\forest_land	11854	cls_3	0.0776	140	6.3246	0.180412
F:\landscape\forest_land	7002	cls_4	0.268	260	6.3246	0.0970149
F:\landscape\forest_land	4383	cls_3	0.0064	40	7.2111	0.625
F:\landscape\forest_land	3554	cls_3	0.0056	40	7.2111	0.714286
F:\landscape\forest_land	618	cls_1	0.0136	60	7.2111	0.441176
F:\landscape\forest_land	8948	cls_3	0.0252	80	7.2111	0.31746
F:\landscape\forest_land	2993	cls_3	0.0396	100	7.2111	0.252525
F:\landscape\forest_land	3817	cls_3	0.2276	240	7.2111	0.105448
F:\landscape\forest_land	4177	cls_2	0.0052	40	8	0.769231
F:\landscape\forest_land	5180	cls_3	0.0056	40	8	0.714286
F:\landscape\forest_land	7232	cls_3	0.0056	40	8	0.714286
F:\landscape\forest_land	4875	cls_2	0.0052	40	8	0.769231
F:\landscape\forest_land	1905	cls_4	0.006	40	8	0.666667
F:\landscape\forest_land	8078	cls_2	0.0132	60	8	0.454545
F:\landscape\forest_land	4132	cls_2	0.0132	60	8	0.454545
F:\landscape\forest_land	4168	cls_3	0.0128	60	8	0.46875
F:\landscape\forest_land	4861	cls_3	0.0368	100	8	0.271739
F:\landscape\forest_land	9434	cls_2	0.0536	120	8	0.223881
F:\landscape\forest_land	1857	cls_4	0.006	40	8.2462	0.666667
F:\landscape\forest_land	11084	cls_3	0.006	40	8.2462	0.666667
F:\landscape\forest_land	9701	cls_3	0.014	60	8.2462	0.428571
F:\landscape\forest_land	6913	cls_3	0.0056	40	8.9443	0.714286
F:\landscape\forest_land	8955	cls_3	0.0144	60	8.9443	0.416667
F:\landscape\forest_land	6708	cls_2	0.0236	80	8.9443	0.338983
F:\landscape\forest_land	6704	cls_2	0.0248	80	8.9443	0.322581
F:\landscape\forest_land	11272	cls_3	0.0248	80	8.9443	0.322581
F:\landscape\forest_land	1016	cls_1	0.0064	40	10	0.625
F:\landscape\forest_land	7222	cls_3	0.0252	80	10	0.31746
F:\landscape\forest_land	3514	cls_3	0.0388	100	10	0.257732
F:\landscape\forest_land	6666	cls_3	0.0064	40	10.198	0.625
F:\landscape\forest_land	5544	cls_2	0.0124	60	10.198	0.483871
F:\landscape\forest_land	2980	cls_3	0.0244	80	10.198	0.327869
F:\landscape\forest_land	11168	cls_2	0.0064	40	10.7703	0.625
F:\landscape\forest_land	4801	cls_3	0.0052	40	10.7703	0.769231
F:\landscape\forest_land	11422	cls_2	0.0136	60	10.7703	0.441176
F:\landscape\forest_land	11286	cls_1	0.0056	40	11.3137	0.714286
F:\landscape\forest_land	3745	cls_2	0.0136	60	11.3137	0.441176
F:\landscape\forest_land	6486	cls_3	0.0128	60	11.3137	0.46875
F:\landscape\forest_land	5407	cls_2	0.0228	80	11.3137	0.350877
F:\landscape\forest_land	1910	cls_3	0.0064	40	11.6619	0.625
F:\landscape\forest_land	5577	cls_2	0.006	40	11.6619	0.666667
F:\landscape\forest_land	9549	cls_1	0.0064	40	12	0.625
F:\landscape\forest_land	11623	cls_1	0.0056	40	12	0.714286
F:\landscape\forest_land	8455	cls_3	0.0228	80	12	0.350877
F:\landscape\forest_land	3535	cls_3	0.006	40	12.6491	0.666667
F:\landscape\forest_land	10782	cls_1	0.006	40	12.6491	0.666667
F:\landscape\forest_land	3028	cls_2	0.0136	60	12.6491	0.441176
F:\landscape\forest_land	9176	cls_3	0.0128	60	12.6491	0.46875
F:\landscape\forest_land	9164	cls_3	0.0056	40	12.8062	0.714286
F:\landscape\forest_land	7567	cls_3	0.0252	80	13.4164	0.31746
F:\landscape\forest_land	8892	cls_3	0.014	60	14	0.428571
F:\landscape\forest_land	455	cls_2	0.0236	80	14	0.338983
F:\landscape\forest_land	7126	cls_2	0.0128	60	14.1421	0.46875
F:\landscape\forest_land	5455	cls_3	0.0368	100	14.4222	0.271739
F:\landscape\forest_land	5434	cls_3	0.006	40	14.5602	0.666667
F:\landscape\forest_land	11215	cls_1	0.158	200	16	0.126582
F:\landscape\forest_land	2100	cls_2	0.006	40	16.1245	0.666667
F:\landscape\forest_land	5722	cls_2	0.0064	40	16.1245	0.625
F:\landscape\forest_land	11670	cls_3	0.1248	180	16.1245	0.144231
F:\landscape\forest_land	4892	cls_3	0.014	60	16.4924	0.428571
F:\landscape\forest_land	6937	cls_3	0.0064	40	16.9706	0.625
F:\landscape\forest_land	4646	cls_2	0.0052	40	17.088	0.769231
F:\landscape\forest_land	8528	cls_3	0.0388	100	17.2047	0.257732
F:\landscape\forest_land	5035	cls_3	0.006	40	17.8885	0.666667
F:\landscape\forest_land	9233	cls_3	0.0052	40	18.4391	0.769231
F:\landscape\forest_land	8238	cls_4	0.0056	40	18.4391	0.714286
F:\landscape\forest_land	5594	cls_3	0.0252	80	18.4391	0.31746
F:\landscape\forest_land	4605	cls_4	0.2624	260	18.4391	0.0990854
F:\landscape\forest_land	5815	cls_2	0.1896	220	19.6977	0.116034
F:\landscape\forest_land	3419	cls_3	0.0136	60	20	0.441176
F:\landscape\forest_land	4666	cls_3	0.0736	140	21.2603	0.190217
F:\landscape\forest_land	5024	cls_3	0.0064	40	22.0907	0.625
F:\landscape\forest_land	7698	cls_2	0.0056	40	22.3607	0.714286
F:\landscape\forest_land	4658	cls_3	0.1856	220	22.3607	0.118534
F:\landscape\forest_land	10648	cls_2	0.0392	100	23.3238	0.255102
F:\landscape\forest_land	3796	cls_3	0.0132	60	23.4094	0.454545
F:\landscape\forest_land	8655	cls_3	0.0056	40	24.7386	0.714286
F:\landscape\forest_land	4570	cls_3	0.0056	40	25.0599	0.714286
F:\landscape\forest_land	1405	cls_3	0.0364	100	26.8328	0.274725
F:\landscape\forest_land	9628	cls_3	0.0052	40	27.2029	0.769231
F:\landscape\forest_land	52	cls_1	0.0232	80	27.2029	0.344828
F:\landscape\forest_land	7327	cls_2	0.0372	100	28	0.268817
F:\landscape\forest_land	8599	cls_3	0.0244	80	28.0713	0.327869
F:\landscape\forest_land	10703	cls_2	0.0056	40	28.6356	0.714286
F:\landscape\forest_land	2337	cls_2	0.0392	100	28.6356	0.255102
F:\landscape\forest_land	1836	cls_3	0.0124	60	29.5296	0.483871
F:\landscape\forest_land	5106	cls_1	0.0128	60	29.5296	0.46875
F:\landscape\forest_land	8012	cls_2	0.0052	40	30	0.769231
F:\landscape\forest_land	8590	cls_3	0.0064	40	30.2655	0.625
F:\landscape\forest_land	4323	cls_2	0.0056	40	31.1127	0.714286
F:\landscape\forest_land	7917	cls_3	0.0144	60	32.5576	0.416667
F:\landscape\forest_land	3771	cls_2	0.0064	40	34.0588	0.625
F:\landscape\forest_land	479	cls_1	0.0052	40	34.176	0.769231
F:\landscape\forest_land	4252	cls_3	0.0132	60	34.9285	0.454545
F:\landscape\forest_land	4295	cls_3	0.0536	120	35.3836	0.223881
F:\landscape\forest_land	6269	cls_3	0.0368	100	35.4401	0.271739
F:\landscape\forest_land	2617	cls_3	0.1592	200	36.7151	0.125628
F:\landscape\forest_land	7920	cls_3	0.0056	40	37.2022	0.714286
F:\landscape\forest_land	8469	cls_3	0.006	40	37.7359	0.666667
F:\landscape\forest_land	4228	cls_3	0.0124	60	38.2099	0.483871
F:\landscape\forest_land	4246	cls_3	0.0056	40	39.598	0.714286
F:\landscape\forest_land	11017	cls_3	0.0232	80	39.598	0.344828
F:\landscape\forest_land	4918	cls_2	0.0136	60	39.8497	0.441176
F:\landscape\forest_land	7949	cls_3	0.0064	40	41.1825	0.625
F:\landscape\forest_land	4723	cls_2	0.0136	60	41.2311	0.441176
F:\landscape\forest_land	6752	cls_3	0.0124	60	42.5206	0.483871
F:\landscape\forest_land	3647	cls_3	0.006	40	43.6807	0.666667
F:\landscape\forest_land	5748	cls_2	0.0248	80	44.4072	0.322581
F:\landscape\forest_land	10287	cls_3	0.006	40	44.9444	0.666667
F:\landscape\forest_land	8365	cls_3	0.0052	40	47.5395	0.769231
F:\landscape\forest_land	10786	cls_3	0.0056	40	48	0.714286
F:\landscape\forest_land	10138	cls_2	0.006	40	48.7032	0.666667
F:\landscape\forest_land	5841	cls_3	0.0056	40	49.3964	0.714286
F:\landscape\forest_land	5641	cls_2	0.006	40	50	0.666667
F:\landscape\forest_land	4388	cls_2	0.0056	40	51.8845	0.714286
F:\landscape\forest_land	9409	cls_3	0.006	40	52.1536	0.666667
F:\landscape\forest_land	3922	cls_2	0.0052	40	52.345	0.769231
F:\landscape\forest_land	6787	cls_3	0.0128	60	54.4059	0.46875
F:\landscape\forest_land	11438	cls_3	0.0772	140	54.5894	0.181347
F:\landscape\forest_land	4814	cls_3	0.0244	80	55.5698	0.327869
F:\landscape\forest_land	8542	cls_3	0.006	40	57.2713	0.666667
F:\landscape\forest_land	7507	cls_3	0.006	40	57.5847	0.666667
F:\landscape\forest_land	6406	cls_3	0.0144	60	60.959	0.416667
F:\landscape\forest_land	1811	cls_3	0.0132	60	63.7809	0.454545
F:\landscape\forest_land	3048	cls_3	0.0124	60	72.6911	0.483871
F:\landscape\forest_land	7486	cls_2	0.0136	60	74.2159	0.441176
F:\landscape\forest_land	4482	cls_3	0.0136	60	76.8375	0.441176
F:\landscape\forest_land	2592	cls_3	0.006	40	78.6384	0.666667
F:\landscape\forest_land	7285	cls_3	0.0756	140	89.6437	0.185185
F:\landscape\forest_land	6496	cls_3	0.0064	40	92.3472	0.625
F:\landscape\forest_land	1922	cls_3	0.0256	80	95.352	0.3125
F:\landscape\forest_land	3804	cls_3	0.006	40	96.0833	0.666667
F:\landscape\forest_land	5892	cls_3	0.0136	60	105.603	0.441176
F:\landscape\forest_land	2981	cls_2	0.0064	40	112.606	0.625
F:\landscape\forest_land	3116	cls_3	0.014	60	123.045	0.428571
F:\landscape\forest_land	6989	cls_3	0.0564	120	131.727	0.212766
F:\landscape\forest_land	3834	cls_3	0.0124	60	138.058	0.483871
F:\landscape\forest_land	8464	cls_3	0.0052	40	139.743	0.769231
F:\landscape\forest_land	7542	cls_3	0.0536	120	152.552	0.223881
F:\landscape\forest_land	3241	cls_3	0.2688	260	152.735	0.0967262
F:\landscape\forest_land	804	cls_1	0.006	40	154.156	0.666667
F:\landscape\forest_land	5182	cls_3	0.3088	280	177.775	0.0906736
F:\landscape\forest_land	9242	cls_3	0.014	60	201.157	0.428571
F:\landscape\forest_land	3530	cls_3	0.0056	40	208.471	0.714286
F:\landscape\forest_land	2741	cls_3	0.014	60	217.568	0.428571
F:\landscape\forest_land	4698	cls_3	0.0244	80	236.212	0.327869
F:\landscape\forest_land	4821	cls_2	0.0052	40	288.444	0.769231
F:\landscape\forest_land	4764	cls_2	0.006	40	288.444	0.666667
F:\landscape\forest_land	1679	cls_3	0.078	140	298.329	0.179487
F:\landscape\forest_land	8864	cls_3	0.0748	140	340.588	0.187166
F:\landscape\forest_land	357	cls_2	2.8908	856	34	0.0296112
F:\landscape\forest_land	670	cls_2	0.2504	256	28.4253	0.102236
F:\landscape\forest_land	559	cls_1	0.2548	256	133.522	0.100471
F:\landscape\forest_land	7584	cls_3	0.1788	216	11.3137	0.120805
F:\landscape\forest_land	10209	cls_3	0.1164	176	7.2111	0.151203
F:\landscape\forest_land	2602	cls_1	0.0924	156	11.6619	0.168831
F:\landscape\forest_land	9717	cls_3	0.0912	156	26.9072	0.171053
F:\landscape\forest_land	4428	cls_4	0.092	156	33.2866	0.169565
F:\landscape\forest_land	1556	cls_3	0.0916	156	298.329	0.170306
F:\landscape\forest_land	2366	cls_3	0.0716	136	16	0.189944
F:\landscape\forest_land	7851	cls_3	0.0728	136	18	0.186813
F:\landscape\forest_land	9074	cls_3	0.068	136	27.2029	0.2
F:\landscape\forest_land	1157	cls_3	0.0716	136	82.0975	0.189944
F:\landscape\forest_land	36	cls_1	1.3972	600	95.352	0.042943
F:\landscape\forest_land	7197	cls_3	0.052	116	8.4853	0.223077
F:\landscape\forest_land	2566	cls_3	0.0512	116	8.9443	0.226562
F:\landscape\forest_land	962	cls_2	0.0492	116	8.9443	0.235772
F:\landscape\forest_land	8424	cls_2	0.0508	116	16.1245	0.228346
F:\landscape\forest_land	4438	cls_3	0.0488	116	23.4094	0.237705
F:\landscape\forest_land	6768	cls_3	0.0496	116	24.4131	0.233871
F:\landscape\forest_land	6549	cls_3	0.05	116	25.0599	0.232
F:\landscape\forest_land	928	cls_1	0.0508	116	28.8444	0.228346
F:\landscape\forest_land	10195	cls_3	0.0508	116	104.938	0.228346
F:\landscape\forest_land	641	cls_1	0.1684	212	55.1725	0.125891
F:\landscape\forest_land	5080	cls_1	5.758	1212	45.607	0.021049
F:\landscape\forest_land	4528	cls_2	0.0348	96	4	0.275862
F:\landscape\forest_land	8567	cls_3	0.0344	96	8.9443	0.27907
F:\landscape\forest_land	7000	cls_3	0.0332	96	10	0.289157
F:\landscape\forest_land	5805	cls_2	0.0356	96	10	0.269663
F:\landscape\forest_land	5410	cls_2	0.0348	96	12	0.275862
F:\landscape\forest_land	1852	cls_3	0.1424	192	20.5913	0.134831
F:\landscape\forest_land	9771	cls_3	0.034	96	22.3607	0.282353
F:\landscape\forest_land	6935	cls_3	0.142	192	22.8035	0.135211
F:\landscape\forest_land	4476	cls_2	0.0332	96	23.3238	0.289157
F:\landscape\forest_land	7205	cls_3	0.0328	96	23.3238	0.292683
F:\landscape\forest_land	8118	cls_3	0.0352	96	30	0.272727
F:\landscape\forest_land	420	cls_3	0.0332	96	36.8782	0.289157
F:\landscape\forest_land	7424	cls_3	0.036	96	46.5188	0.266667
F:\landscape\forest_land	10312	cls_3	0.1388	192	55.4617	0.138329
F:\landscape\forest_land	10500	cls_3	0.0332	96	62	0.289157
F:\landscape\forest_land	11377	cls_3	0.0336	96	92.0217	0.285714
F:\landscape\forest_land	3441	cls_2	0.0344	96	106.733	0.27907
F:\landscape\forest_land	913	cls_1	0.14	192	121.655	0.137143
F:\landscape\forest_land	965	cls_3	2.3724	784	110.073	0.0330467
F:\landscape\forest_land	6916	cls_3	0.1124	172	34	0.153025
F:\landscape\forest_land	5762	cls_3	0.684	420	27.8568	0.0614035
F:\landscape\forest_land	4627	cls_3	0.2352	248	12.6491	0.105442
F:\landscape\forest_land	11905	cls_2	1.5296	628	22.8035	0.0410565
F:\landscape\forest_land	2869	cls_4	0.0224	76	4.4721	0.339286
F:\landscape\forest_land	11161	cls_3	0.022	76	5.6569	0.345455
F:\landscape\forest_land	3861	cls_2	0.0212	76	6	0.358491
F:\landscape\forest_land	4063	cls_2	0.0212	76	6	0.358491
F:\landscape\forest_land	5899	cls_2	0.022	76	6.3246	0.345455
F:\landscape\forest_land	9655	cls_4	0.0204	76	7.2111	0.372549
F:\landscape\forest_land	5300	cls_3	0.02	76	7.2111	0.38
F:\landscape\forest_land	285	cls_1	0.0204	76	7.2111	0.372549
F:\landscape\forest_land	4161	cls_3	0.0204	76	8	0.372549
F:\landscape\forest_land	1386	cls_1	0.022	76	8.2462	0.345455
F:\landscape\forest_land	5674	cls_3	0.0212	76	8.4853	0.358491
F:\landscape\forest_land	4095	cls_2	0.022	76	10	0.345455
F:\landscape\forest_land	11240	cls_3	0.0208	76	10	0.365385
F:\landscape\forest_land	4408	cls_2	0.0216	76	10	0.351852
F:\landscape\forest_land	7799	cls_3	0.0224	76	12	0.339286
F:\landscape\forest_land	11633	cls_1	0.022	76	13.4164	0.345455
F:\landscape\forest_land	4729	cls_3	0.0888	152	14	0.171171
F:\landscape\forest_land	1603	cls_3	0.0212	76	14.1421	0.358491
F:\landscape\forest_land	1553	cls_2	0.0876	152	18.1108	0.173516
F:\landscape\forest_land	10014	cls_3	0.0208	76	18.4391	0.365385
F:\landscape\forest_land	3493	cls_2	0.0224	76	18.4391	0.339286
F:\landscape\forest_land	9039	cls_3	0.02	76	20.0998	0.38
F:\landscape\forest_land	10479	cls_3	0.0216	76	20.5913	0.351852
F:\landscape\forest_land	1196	cls_1	0.0888	152	28.4253	0.171171
F:\landscape\forest_land	6646	cls_3	0.0876	152	30.4631	0.173516
F:\landscape\forest_land	4082	cls_2	0.0212	76	32.311	0.358491
F:\landscape\forest_land	3659	cls_3	0.0208	76	34.9285	0.365385
F:\landscape\forest_land	4377	cls_3	0.02	76	35.609	0.38
F:\landscape\forest_land	4972	cls_3	0.022	76	40.4475	0.345455
F:\landscape\forest_land	8951	cls_3	0.0216	76	44	0.351852
F:\landscape\forest_land	2673	cls_3	1.0996	532	45.607	0.0483812
F:\landscape\forest_land	3358	cls_3	0.0216	76	51.614	0.351852
F:\landscape\forest_land	6110	cls_3	0.0852	152	95.6033	0.178404
F:\landscape\forest_land	1992	cls_3	0.0204	76	114.543	0.372549
F:\landscape\forest_land	1411	cls_1	1.8008	684	238.437	0.0379831
F:\landscape\forest_land	10767	cls_2	0.0216	76	414.787	0.351852
F:\landscape\forest_land	6189	cls_3	0.064	132	6	0.20625
F:\landscape\forest_land	1527	cls_3	0.0644	132	10	0.204969
F:\landscape\forest_land	7497	cls_2	0.2692	264	10	0.0980683
F:\landscape\forest_land	8561	cls_3	0.0664	132	12.1655	0.198795
F:\landscape\forest_land	11263	cls_2	0.0664	132	23.3238	0.198795
F:\landscape\forest_land	10511	cls_3	0.0672	132	30.4631	0.196429
F:\landscape\forest_land	7554	cls_3	0.0656	132	72.4431	0.20122
F:\landscape\forest_land	3979	cls_3	0.396	320	331.693	0.0808081
F:\landscape\forest_land	7204	cls_3	0.2288	244	8	0.106643
F:\landscape\forest_land	9984	cls_3	0.2224	244	8	0.109712
F:\landscape\forest_land	8146	cls_3	0.0104	56	4	0.538462
F:\landscape\forest_land	5303	cls_3	0.0112	56	4	0.5
F:\landscape\forest_land	8696	cls_2	0.0104	56	4	0.538462
F:\landscape\forest_land	8347	cls_3	0.012	56	4	0.466667
F:\landscape\forest_land	10896	cls_3	0.012	56	4	0.466667
F:\landscape\forest_land	5492	cls_2	0.0112	56	4.4721	0.5
F:\landscape\forest_land	1867	cls_4	0.0104	56	4.4721	0.538462
F:\landscape\forest_land	4436	cls_2	0.012	56	4.4721	0.466667
F:\landscape\forest_land	1259	cls_1	0.012	56	5.6569	0.466667
F:\landscape\forest_land	6254	cls_4	0.0108	56	5.6569	0.518519
F:\landscape\forest_land	7589	cls_3	0.0108	56	6	0.518519
F:\landscape\forest_land	2538	cls_3	0.0112	56	6	0.5
F:\landscape\forest_land	3030	cls_2	0.0104	56	6.3246	0.538462
F:\landscape\forest_land	3444	cls_2	0.0104	56	6.3246	0.538462
F:\landscape\forest_land	6715	cls_2	0.0104	56	6.3246	0.538462
F:\landscape\forest_land	3218	cls_3	0.0112	56	7.2111	0.5
F:\landscape\forest_land	5975	cls_3	0.0116	56	7.2111	0.482759
F:\landscape\forest_land	3215	cls_3	0.0116	56	7.2111	0.482759
F:\landscape\forest_land	4713	cls_3	0.0108	56	7.2111	0.518519
F:\landscape\forest_land	8685	cls_3	0.0116	56	8	0.482759
F:\landscape\forest_land	6525	cls_2	0.0104	56	8.4853	0.538462
F:\landscape\forest_land	3573	cls_3	0.0116	56	8.9443	0.482759
F:\landscape\forest_land	841	cls_2	0.0112	56	8.9443	0.5
F:\landscape\forest_land	1455	cls_3	0.0108	56	10.7703	0.518519
F:\landscape\forest_land	2729	cls_4	0.0116	56	10.7703	0.482759
F:\landscape\forest_land	7882	cls_2	0.2972	280	13.4164	0.0942126
F:\landscape\forest_land	9281	cls_3	0.0464	112	14	0.241379
F:\landscape\forest_land	5673	cls_2	0.0112	56	14.1421	0.5
F:\landscape\forest_land	9723	cls_4	0.0108	56	14.1421	0.518519
F:\landscape\forest_land	5031	cls_3	0.0104	56	14.4222	0.538462
F:\landscape\forest_land	3897	cls_3	0.012	56	16	0.466667
F:\landscape\forest_land	2428	cls_3	0.0108	56	16.1245	0.518519
F:\landscape\forest_land	7324	cls_2	0.0112	56	18.4391	0.5
F:\landscape\forest_land	9060	cls_3	0.0468	112	24	0.239316
F:\landscape\forest_land	3909	cls_3	0.0104	56	24.0832	0.538462
F:\landscape\forest_land	147	cls_3	0.0112	56	24.4131	0.5
F:\landscape\forest_land	4363	cls_3	0.0108	56	30	0.518519
F:\landscape\forest_land	4996	cls_2	0.0464	112	30	0.241379
F:\landscape\forest_land	11861	cls_1	0.0112	56	32	0.5
F:\landscape\forest_land	6841	cls_3	0.0116	56	32.9848	0.482759
F:\landscape\forest_land	5016	cls_3	0.012	56	34.0588	0.466667
F:\landscape\forest_land	2998	cls_2	0.0104	56	38.2099	0.538462
F:\landscape\forest_land	10345	cls_3	0.0112	56	39.3954	0.5
F:\landscape\forest_land	6097	cls_3	0.012	56	39.598	0.466667
F:\landscape\forest_land	10810	cls_3	0.0464	112	40	0.241379
F:\landscape\forest_land	4832	cls_3	0.0116	56	40.1995	0.482759
F:\landscape\forest_land	4631	cls_3	0.0104	56	40.2492	0.538462
F:\landscape\forest_land	7070	cls_3	0.1076	168	40.4969	0.156134
F:\landscape\forest_land	9509	cls_4	0.0104	56	44.9444	0.538462
F:\landscape\forest_land	10942	cls_3	0.0104	56	46.0435	0.538462
F:\landscape\forest_land	8378	cls_3	0.0108	56	50.9902	0.518519
F:\landscape\forest_land	2041	cls_3	0.0108	56	51.1077	0.518519
F:\landscape\forest_land	1532	cls_3	0.0464	112	56	0.241379
F:\landscape\forest_land	7880	cls_3	0.0108	56	58.2409	0.518519
F:\landscape\forest_land	7564	cls_3	0.0104	56	72.4431	0.538462
F:\landscape\forest_land	2712	cls_3	0.0112	56	76.6551	0.5
F:\landscape\forest_land	8161	cls_2	0.012	56	84.8999	0.466667
F:\landscape\forest_land	10367	cls_3	0.0112	56	85.1587	0.5
[truncated: 9,910 more rows]

## Sheet: carbon&mertics
	TA	NP	PD	LPI	ED	AREA_MN	PARA_AM	LSI	ENN_MN	SOC density	biomass C density	biomass C stocks	SOC stocks	total C stocks
Daoli	59.84	372	621.658	21.5468	1.2366	0.1609	1581.62	30.5459	42.1221	69.09	68.7748	0.411481	0.413367	0.824848
daowai	299.141	2001	668.915	5.6512	8.6247	0.1495	1619.93	69.6543	40.1912	56.053	60.7534	1.81729	1.67669	3.49398
nangang	1827.35	5224	285.879	7.3884	4.0025	0.3498	1121.18	119.384	38.1979	54.897	56.1146	10.2537	10.0312	20.2848
songbei	1561.19	4392	281.324	1.6477	2.4289	0.3555	1277.58	125.933	52.7767	50.615	108.147	16.9123	7.91528	24.8276
xiangfang	363.777	1477	406.018	5.7767	0.3574	0.2463	1384.68	65.9835	46.7028	65.1988	46.1618	1.67939	2.37196	4.05135
first-ring	474.467	1435	302.445	2.9605	0.9105	0.3306	1116.02	60.7026	62.5402	56.5169	100.049	4.74636	2.68119	7.42755
second-ring	613.703	2803	456.735	3.9916	4.2659	0.2189	1420.28	87.6725	38.573	57.1706	77.5015	4.75532	3.50786	8.26317
third-ring	980.876	2315	236.014	13.7544	5.2137	0.4237	1151.38	89.739	40.5932	44.1471	66.0428	6.47832	4.33051	10.8088
forth-ring	1308.86	4038	308.512	8.8938	3.9913	0.3241	1216.06	109.621	41.153	53.3372	104	13.6105	6.98028	20.5908
AF	1225.84	5631	150.273	0.6865	1.6962	0.2177	1394.06	121.995	41.6261	47.4932	51.3613	6.3049	5.83007	12.135
RF	941.895	4327	115.474	0.405	3.4976	0.2177	1751.95	134.377	32.4203	55.431	71.5683	6.75229	5.22977	11.9821
LF	959.381	488	13.0232	3.5947	1.2105		559.052	43.2815	64.5673	68.4656	62.8756	6.04441	6.5818	12.6262
EF	620.053	1463	39.0428	0.2767	1.0851	0.4238	1164.57	72.4705	68.8913	50.6957	155.01	9.63377	3.1507	12.7845
100-yr	75.2976	311	413.028	15.4353	0.0266	0.2421	1241.79	26.9303	89.6403	69.3938	50.2925	0.378732	0.522576	0.901307
80-yr	69.0524	482	698.021	3.9941	8.4573	0.1433	1725.3	35.6655	49.0025	60.5587	78.6623	0.54304	0.418063	0.961103
70-yr	314.587	1404	446.3	18.8571	3.0898	0.2241	1385.05	61.2666	43.6038	62.0129	62.5592	1.97017	1.95297	3.92314
50-yr	508.258	2418	475.743	3.4735	2.5853	0.2102	1468.02	82.5741	44.9334	50.6135	68.3769	3.47515	2.57235	6.0475
10-yr	1382.24	3858	279.113	4.3572	5.29	0.3583	1099.6	101.707	43.3076	54.8217	59.6201	8.24045	7.57723	15.8177
0-yr	453.062	2008	443.206	4.1189	1.7702	0.2256	1407.12	74.7663	85.3029	50.741	55.1533	2.49857	2.29869	4.79726
unsettled	1169.1	3067	262.337	1.4355	2.5541	0.3812	1196.32	102.02	74.1596	53.5156	161.846	18.9628	6.27022	25.2331
