# Supplementary material for: Association of urban forest landscape characteristics with biomass and soil carbon stocks in Harbin City, Northeastern China
Source: PeerJ. 2018 Oct 29;6:e5825. doi: 10.7717/peerj.5825 (PMC6211268; doi:10.7717/peerj.5825)
Supplement: Table S1 [file peerj-06-5825-s002.docx]

**Appendix Table 1** Landscape metrics used in this study and their equations and ecological descriptions

| Index | Equation | Description |
| --- | --- | --- |
| TA | (ha) | Total area. ai, area of the ith patch (m2). |
| NP |  | Number of patches. ni, number of patches of the focal type in landscape. |
| LPI | （%） | Largest patch index, percentage of the largest patch of the focal type in the landscape, mainly reflecting configuration. AT, total landscape area (m2). |
| AREA_MN | (ha) | Mean patch area, mainly reflecting configuration. |
| PARA_AM |  | Area-weighted Perimeter-Area Ratio, mainly reflecting the complexity of patch shape, ratio of the patch perimeter (m) to area (m2). pij, perimeter (m) of patch i. |
| LSI |  | Landscape shape index, mainly reflecting the aggregation/dispersion of patches, eik, total length (m) of edge in landscape between patch types i and k. |
| ENN_MN | (m) | Euclidean Nearest-Neighbor Distance, mainly reflecting the connectivity of patches, hij, distance (m) from patch ij to nearest neighboring patch of the same type |
